# Supplementary material for: Unveiling the Genetic Mechanism of Meat Color in Pigs through GWAS, Multi-Tissue, and Single-Cell Transcriptome Signatures Exploration
Source: MDPI journal article supplement (doi:10.3390/ijms25073682), 2024-03-26
Supplement: s1 [file s1]

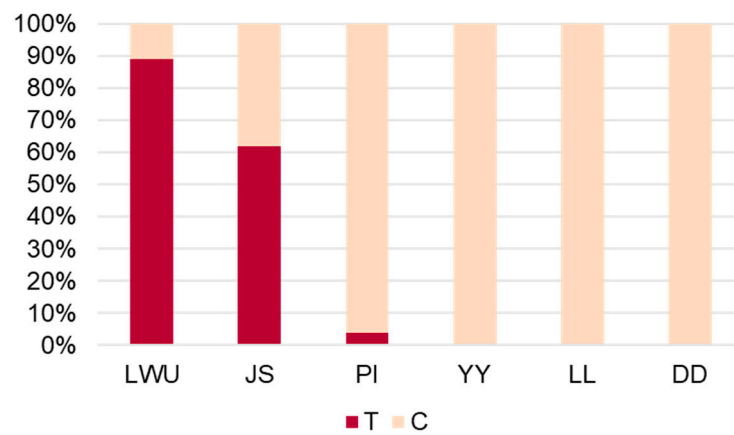

Figure S1. The allele frequency of the promising SNP in pigs with different meat color characteristics

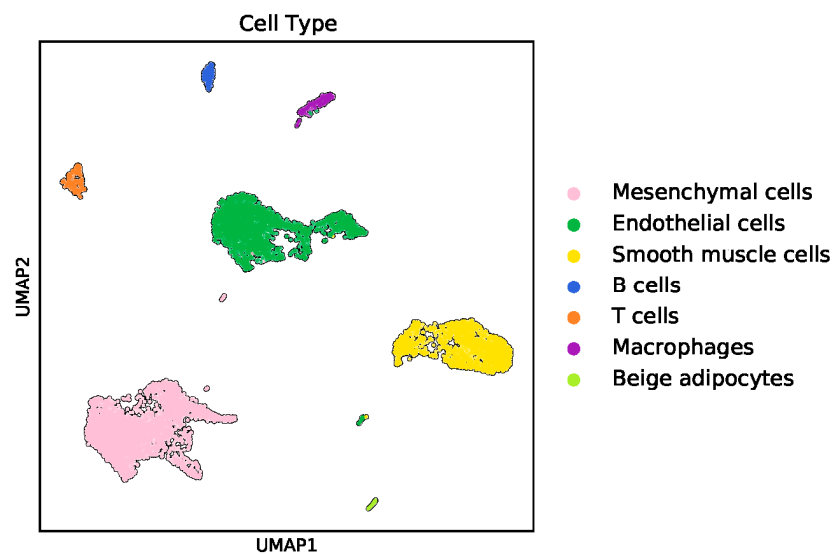

Figure S2. The uniform manifold approximation and projection (UMAP) of scRNA-seq data from adipose tissue

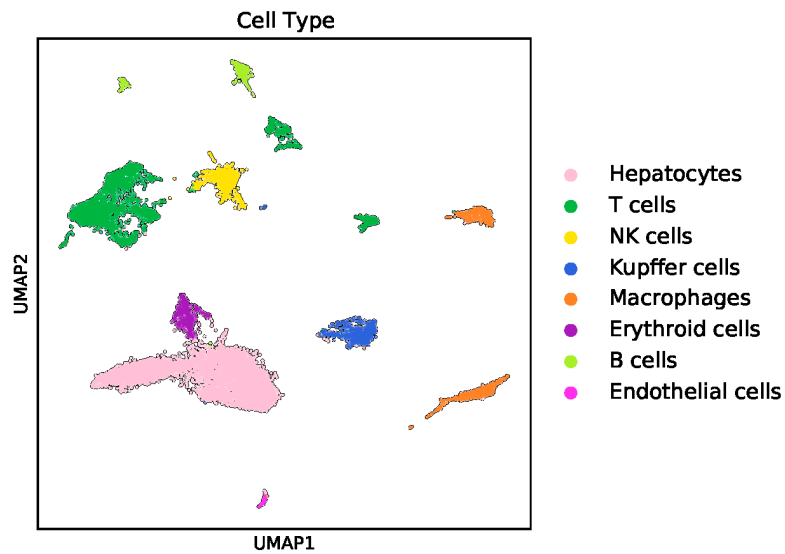

Figure S3. The uniform manifold approximation and projection (UMAP) of  
scRNA-seq data from liver tissue

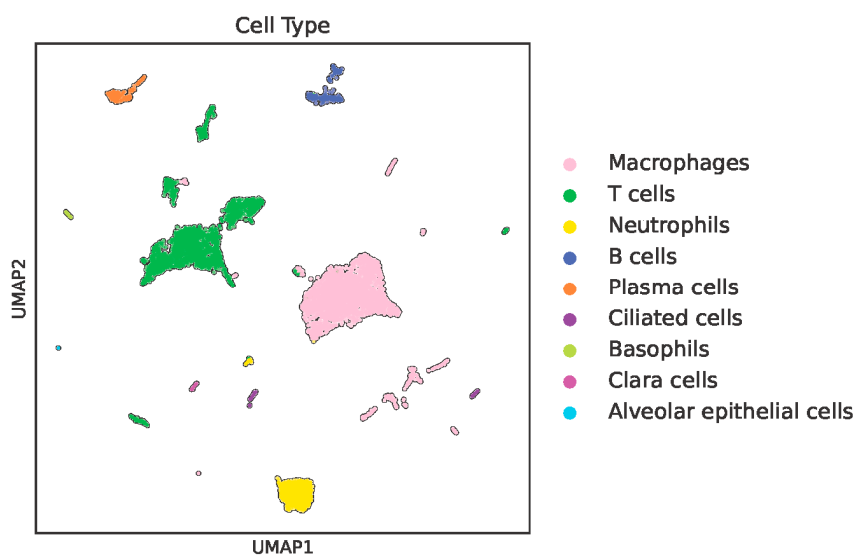

Figure S4. The uniform manifold approximation and projection (UMAP) of  
scRNA-seq data from lung tissue

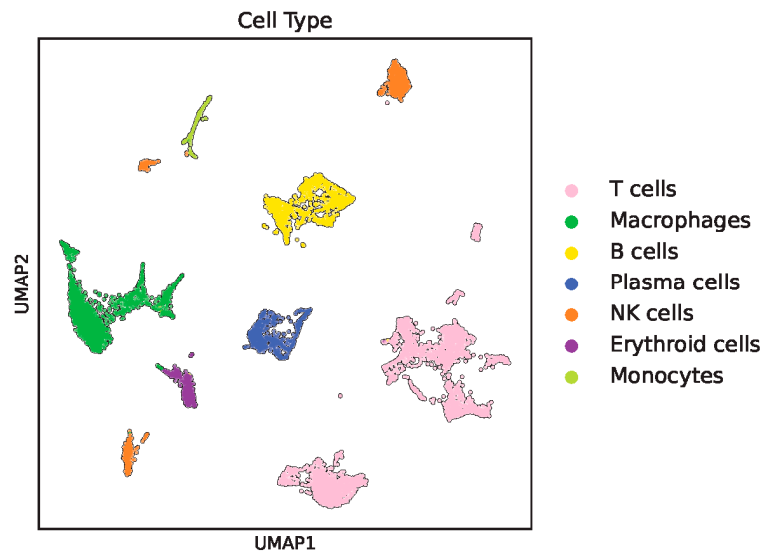

Figure S5. The uniform manifold approximation and projection (UMAP) of  
scRNA-seq data from spleen tissue
