# Supplementary material for: Unveiling the Genetic Mechanism of Meat Color in Pigs through GWAS, Multi-Tissue, and Single-Cell Transcriptome Signatures Exploration
Source: Int J Mol Sci. 2024 Mar 26;25(7):3682. doi: 10.3390/ijms25073682 (PMC11012088; doi:10.3390/ijms25073682)
Supplement: Supplementary file 1 [file ijms-25-03682-s001.zip › Supplementary Table.xlsx]

## Sheet: TableS1
Table S1. The candidate SNPs associated with meat color traits in pigs
Trait	SNP	Chr	Position	P-value
L*	3_6002588	3	6002588	2.57997e-07
	6_2992189	6	2992189	2.73942e-07
	9_122912114	9	122912114	9.34932e-08
	11_6188381	11	6188381	2.80569e-07
	15_135135922	15	135135922	1.91863e-07
	15_135164396	15	135164396	1.69544e-07
	15_135164457	15	135164457	5.51687e-08
	15_135164499	15	135164499	1.16042e-07
	15_135250924	15	135250924	9.75499e-08
	15_135253012	15	135253012	2.80716e-07
	15_135254155	15	135254155	2.80716e-07
	15_135255674	15	135255674	1.12369e-07
	15_135255797	15	135255797	1.12369e-07
	15_135255827	15	135255827	1.12369e-07
	15_135256115	15	135256115	1.12369e-07
	15_135256755	15	135256755	1.12369e-07
	15_135260247	15	135260247	1.40997e-07
	15_135267596	15	135267596	2.56623e-07
	15_135267626	15	135267626	2.56623e-07
a*	6_65876337	6	65876337	1.85102e-07
	6_65933032	6	65933032	2.0155e-07
	6_66800541	6	66800541	1.67543e-07
	6_66800722	6	66800722	1.67543e-07
	6_66802520	6	66802520	1.67543e-07
	6_66802636	6	66802636	1.67543e-07
	6_66802744	6	66802744	1.67543e-07
	6_66802890	6	66802890	1.67543e-07
	6_66802942	6	66802942	1.67543e-07
	6_66803044	6	66803044	1.67543e-07
	6_66803122	6	66803122	1.67543e-07
	6_66803189	6	66803189	1.67543e-07
	6_66803301	6	66803301	1.67543e-07
	6_66803425	6	66803425	1.67543e-07
	6_66803456	6	66803456	1.67543e-07
	6_66803505	6	66803505	1.67543e-07
	6_66803563	6	66803563	1.67543e-07
	6_66803664	6	66803664	1.67543e-07
	6_66803729	6	66803729	1.67543e-07
	6_66803770	6	66803770	1.67543e-07
	6_66804782	6	66804782	9.92173e-08
	6_66807068	6	66807068	1.67543e-07
	6_68676398	6	68676398	1.13762e-07
	6_68679356	6	68679356	1.13762e-07
	6_68679820	6	68679820	1.13762e-07
	6_68745910	6	68745910	2.55682e-07
	6_68769507	6	68769507	2.55682e-07
	6_69103754	6	69103754	2.91372e-07
	6_153966756	6	153966756	2.55248e-07
	6_156151118	6	156151118	2.59847e-07
	10_60227983	10	60227983	2.03902e-07
	10_60238284	10	60238284	1.2354e-07
	14_48805995	14	48805995	4.82668e-08
	14_118583268	14	118583268	2.91792e-07
	15_6662644	15	6662644	3.8247e-08
b*	6_66804782	6	66804782	2.6697e-07
	6_150445038	6	150445038	2.77768e-07
	6_150488613	6	150488613	2.51167e-07
	6_150488729	6	150488729	2.51167e-07
	6_150490057	6	150490057	2.51167e-07
	6_150498000	6	150498000	1.81514e-07
	6_150498067	6	150498067	1.81514e-07
	6_150498657	6	150498657	1.81514e-07
	6_150499056	6	150499056	2.35736e-07
	6_150499135	6	150499135	1.81514e-07
	6_150499175	6	150499175	1.81514e-07
	6_150499290	6	150499290	1.81514e-07
	6_150499471	6	150499471	1.81514e-07
	6_150521698	6	150521698	3.11277e-08
	6_150521842	6	150521842	1.9432e-07
	6_150522102	6	150522102	4.54302e-08
	6_150522188	6	150522188	1.9432e-07
	6_150526501	6	150526501	2.90021e-07
	6_150527356	6	150527356	2.90021e-07
	6_150982839	6	150982839	1.93453e-07
	6_151012618	6	151012618	7.51968e-08
	6_151017136	6	151017136	2.88425e-08
	6_151020536	6	151020536	7.51968e-08
	6_151021311	6	151021311	7.51968e-08
	6_151021843	6	151021843	7.51968e-08
	6_151038395	6	151038395	1.05165e-07
	6_151039094	6	151039094	2.88425e-08
	6_151098311	6	151098311	1.42981e-07
	6_151098729	6	151098729	1.42981e-07
	6_151102168	6	151102168	1.42981e-07
	15_130725485	15	130725485	1.40514e-07
	15_130829530	15	130829530	1.74291e-08
	15_130845577	15	130845577	2.41869e-07
	15_134038873	15	134038873	1.24374e-07
	15_134072006	15	134072006	3.00582e-07
C*	6_41151093	6	41151093	1.89499e-07
	6_41153154	6	41153154	1.06451e-07
	6_65876337	6	65876337	1.63823e-07
	6_65932390	6	65932390	1.41582e-07
	6_65933032	6	65933032	1.10216e-07
	6_66111199	6	66111199	1.19074e-07
	6_66112217	6	66112217	1.19074e-07
	6_66114733	6	66114733	1.19074e-07
	6_66116570	6	66116570	1.19074e-07
	6_66117555	6	66117555	1.19074e-07
	6_66118900	6	66118900	1.19074e-07
	6_66119446	6	66119446	1.19074e-07
	6_66120377	6	66120377	1.19074e-07
	6_66120724	6	66120724	1.19074e-07
	6_66125107	6	66125107	1.19074e-07
	6_66126230	6	66126230	1.19074e-07
	6_66126455	6	66126455	1.19074e-07
	6_66126505	6	66126505	1.19074e-07
	6_66127348	6	66127348	1.19074e-07
	6_66127911	6	66127911	1.19074e-07
	6_66129509	6	66129509	1.19074e-07
	6_66129878	6	66129878	1.19074e-07
	6_66131132	6	66131132	1.19074e-07
	6_66131225	6	66131225	1.19074e-07
	6_66131917	6	66131917	1.19074e-07
	6_66132155	6	66132155	1.19074e-07
	6_66132227	6	66132227	1.19074e-07
	6_66132948	6	66132948	1.19074e-07
	6_66133086	6	66133086	1.19074e-07
	6_66133801	6	66133801	1.19074e-07
	6_66134902	6	66134902	1.19074e-07
	6_66134979	6	66134979	1.19074e-07
	6_66138469	6	66138469	1.19074e-07
	6_66138641	6	66138641	1.19074e-07
	6_66138834	6	66138834	1.19074e-07
	6_66146703	6	66146703	1.19074e-07
	6_66146996	6	66146996	1.19074e-07
	6_66147422	6	66147422	1.19074e-07
	6_66148887	6	66148887	1.19074e-07
	6_66148951	6	66148951	1.19074e-07
	6_66148973	6	66148973	1.19074e-07
	6_66148997	6	66148997	1.19074e-07
	6_66149230	6	66149230	1.19074e-07
	6_66149506	6	66149506	1.19074e-07
	6_66150613	6	66150613	1.19074e-07
	6_66150618	6	66150618	1.19074e-07
	6_66151056	6	66151056	1.19074e-07
	6_66151185	6	66151185	1.19074e-07
	6_66151442	6	66151442	1.19074e-07
	6_66151498	6	66151498	1.19074e-07
	6_66151941	6	66151941	1.19074e-07
	6_66152189	6	66152189	1.19074e-07
	6_66152234	6	66152234	1.19074e-07
	6_66152330	6	66152330	1.19074e-07
	6_66152351	6	66152351	1.19074e-07
	6_66152470	6	66152470	1.19074e-07
	6_66152504	6	66152504	1.19074e-07
	6_66152620	6	66152620	1.19074e-07
	6_66152868	6	66152868	1.19074e-07
	6_66152960	6	66152960	6.46663e-08
	6_66152987	6	66152987	6.46663e-08
	6_66172006	6	66172006	2.5638e-07
	6_66172050	6	66172050	2.5638e-07
	6_66488520	6	66488520	1.09064e-07
	6_66522687	6	66522687	1.09064e-07
	6_66522899	6	66522899	1.09064e-07
	6_66525228	6	66525228	1.09064e-07
	6_66531260	6	66531260	2.44255e-07
	6_66531330	6	66531330	2.44255e-07
	6_66531342	6	66531342	2.44255e-07
	6_66531344	6	66531344	2.44255e-07
	6_66531375	6	66531375	2.44255e-07
	6_66531415	6	66531415	2.44255e-07
	6_66690642	6	66690642	2.44255e-07
	6_66765692	6	66765692	2.60223e-07
	6_66773442	6	66773442	1.19074e-07
	6_66774009	6	66774009	1.19074e-07
	6_66774532	6	66774532	1.19074e-07
	6_66775392	6	66775392	1.19074e-07
	6_66776382	6	66776382	1.19074e-07
	6_66777646	6	66777646	1.19074e-07
	6_66778965	6	66778965	1.19074e-07
	6_66780702	6	66780702	1.19074e-07
	6_66780842	6	66780842	1.19074e-07
	6_66781038	6	66781038	1.19074e-07
	6_66781870	6	66781870	1.19074e-07
	6_66782296	6	66782296	1.19074e-07
	6_66782454	6	66782454	1.19074e-07
	6_66782830	6	66782830	1.19074e-07
	6_66784066	6	66784066	1.53524e-07
	6_66793715	6	66793715	1.19074e-07
	6_66794963	6	66794963	1.19074e-07
	6_66795312	6	66795312	1.19074e-07
	6_66795532	6	66795532	1.19074e-07
	6_66797811	6	66797811	1.19074e-07
	6_66800139	6	66800139	1.19074e-07
	6_66800541	6	66800541	2.2139e-08
	6_66800722	6	66800722	2.2139e-08
	6_66800895	6	66800895	1.19074e-07
	6_66800960	6	66800960	1.19074e-07
	6_66801771	6	66801771	1.19074e-07
	6_66801947	6	66801947	1.19074e-07
	6_66802520	6	66802520	2.2139e-08
	6_66802636	6	66802636	2.2139e-08
	6_66802744	6	66802744	2.2139e-08
	6_66802863	6	66802863	1.19074e-07
	6_66802890	6	66802890	2.2139e-08
	6_66802942	6	66802942	2.2139e-08
	6_66803044	6	66803044	2.2139e-08
	6_66803122	6	66803122	2.2139e-08
	6_66803186	6	66803186	1.19074e-07
	6_66803189	6	66803189	2.2139e-08
	6_66803207	6	66803207	5.02266e-08
	6_66803301	6	66803301	2.2139e-08
	6_66803425	6	66803425	2.2139e-08
	6_66803456	6	66803456	2.2139e-08
	6_66803505	6	66803505	2.2139e-08
	6_66803563	6	66803563	2.2139e-08
	6_66803664	6	66803664	2.2139e-08
	6_66803729	6	66803729	2.2139e-08
	6_66803770	6	66803770	2.2139e-08
	6_66804089	6	66804089	1.19074e-07
	6_66804164	6	66804164	1.19074e-07
	6_66804191	6	66804191	1.19074e-07
	6_66804211	6	66804211	1.19074e-07
	6_66804218	6	66804218	1.19074e-07
	6_66804266	6	66804266	1.19074e-07
	6_66804269	6	66804269	1.19074e-07
	6_66804278	6	66804278	1.19074e-07
	6_66804354	6	66804354	1.19074e-07
	6_66804782	6	66804782	6.88654e-09
	6_66805996	6	66805996	1.19074e-07
	6_66806503	6	66806503	1.19074e-07
	6_66806983	6	66806983	1.19074e-07
	6_66807068	6	66807068	2.2139e-08
	6_66807553	6	66807553	1.19074e-07
	6_66807704	6	66807704	1.19074e-07
	6_66808938	6	66808938	1.19074e-07
	6_66812737	6	66812737	1.19074e-07
	6_66813709	6	66813709	1.19074e-07
	6_66813757	6	66813757	1.19074e-07
	6_66814308	6	66814308	1.19074e-07
	6_66814390	6	66814390	1.19074e-07
	6_66814422	6	66814422	1.19074e-07
	6_66814594	6	66814594	1.19074e-07
	6_66815968	6	66815968	2.97784e-07
	6_66815972	6	66815972	2.97784e-07
	6_66816086	6	66816086	2.97784e-07
	6_66816091	6	66816091	2.97784e-07
	6_66816121	6	66816121	2.97784e-07
	6_66816122	6	66816122	2.97784e-07
	6_66816183	6	66816183	2.97784e-07
	6_66816247	6	66816247	2.16574e-07
	6_66816526	6	66816526	2.97784e-07
	6_66816549	6	66816549	2.97784e-07
	6_66816559	6	66816559	2.97784e-07
	6_66816728	6	66816728	1.19074e-07
	6_66817057	6	66817057	1.19074e-07
	6_66817834	6	66817834	1.19074e-07
	6_66817879	6	66817879	1.19074e-07
	6_66819002	6	66819002	1.19074e-07
	6_66819141	6	66819141	2.9614e-07
	6_66819195	6	66819195	1.19074e-07
	6_66819196	6	66819196	2.9614e-07
	6_66819230	6	66819230	1.19074e-07
	6_66819359	6	66819359	1.19074e-07
	6_66820005	6	66820005	1.19074e-07
	6_66820559	6	66820559	1.19074e-07
	6_66820975	6	66820975	1.19074e-07
	6_66821256	6	66821256	1.19074e-07
	6_66821576	6	66821576	1.19074e-07
	6_66821821	6	66821821	1.19074e-07
	6_66821844	6	66821844	1.19074e-07
	6_66823927	6	66823927	1.19074e-07
	6_66825196	6	66825196	1.19074e-07
	6_66825320	6	66825320	1.19074e-07
	6_66826951	6	66826951	1.19074e-07
	6_66827285	6	66827285	1.19074e-07
	6_66827558	6	66827558	1.19074e-07
	6_66831479	6	66831479	1.19074e-07
	6_66832196	6	66832196	1.19074e-07
	6_66835245	6	66835245	1.19074e-07
	6_66835785	6	66835785	1.19074e-07
	6_66844826	6	66844826	1.19074e-07
	6_66845219	6	66845219	1.19074e-07
	6_66857260	6	66857260	1.19074e-07
	6_66859836	6	66859836	1.19074e-07
	6_66862674	6	66862674	1.19074e-07
	6_66864636	6	66864636	1.19074e-07
	6_66870946	6	66870946	1.19074e-07
	6_66872869	6	66872869	1.19074e-07
	6_66874066	6	66874066	1.19074e-07
	6_66874067	6	66874067	1.19074e-07
	6_66875132	6	66875132	1.19074e-07
	6_66876095	6	66876095	1.19074e-07
	6_66876472	6	66876472	1.19074e-07
	6_66876520	6	66876520	1.19074e-07
	6_66876521	6	66876521	1.19074e-07
	6_66877686	6	66877686	1.19074e-07
	6_66877692	6	66877692	1.19074e-07
	6_66877696	6	66877696	1.19074e-07
	6_66877725	6	66877725	1.19074e-07
	6_66877781	6	66877781	2.24758e-07
	6_66877847	6	66877847	1.19074e-07
	6_66877903	6	66877903	1.19074e-07
	6_66878091	6	66878091	1.19074e-07
	6_66878098	6	66878098	1.19074e-07
	6_66878360	6	66878360	1.19074e-07
	6_66878688	6	66878688	1.19074e-07
	6_66878721	6	66878721	1.19074e-07
	6_66878915	6	66878915	1.19074e-07
	6_66879083	6	66879083	1.19074e-07
	6_66879128	6	66879128	1.19074e-07
	6_66879290	6	66879290	1.19074e-07
	6_66879443	6	66879443	1.19074e-07
	6_66879504	6	66879504	1.19074e-07
	6_66879785	6	66879785	1.19074e-07
	6_66879982	6	66879982	1.19074e-07
	6_66880207	6	66880207	1.19074e-07
	6_66880314	6	66880314	1.19074e-07
	6_66880635	6	66880635	1.19074e-07
	6_66880654	6	66880654	1.19074e-07
	6_66881062	6	66881062	1.19074e-07
	6_66881351	6	66881351	1.19074e-07
	6_66883335	6	66883335	1.19074e-07
	6_66886220	6	66886220	1.19074e-07
	6_66886883	6	66886883	1.19074e-07
	6_66886896	6	66886896	1.19074e-07
	6_66887431	6	66887431	1.19074e-07
	6_66887484	6	66887484	1.19074e-07
	6_66887949	6	66887949	1.19074e-07
	6_66887987	6	66887987	1.19074e-07
	6_66888267	6	66888267	1.19074e-07
	6_66888292	6	66888292	1.19074e-07
	6_66889177	6	66889177	1.19074e-07
	6_66889521	6	66889521	1.19074e-07
	6_66889544	6	66889544	1.19074e-07
	6_66889876	6	66889876	1.19074e-07
	6_66889991	6	66889991	1.19074e-07
	6_66890134	6	66890134	1.19074e-07
	6_66890161	6	66890161	1.19074e-07
	6_66890422	6	66890422	1.19074e-07
	6_66890757	6	66890757	1.19074e-07
	6_66891145	6	66891145	1.19074e-07
	6_66891389	6	66891389	1.19074e-07
	6_66891565	6	66891565	1.19074e-07
	6_66891874	6	66891874	1.19074e-07
	6_66892416	6	66892416	1.19074e-07
	6_66892457	6	66892457	9.55171e-08
	6_66892628	6	66892628	9.55171e-08
	6_66892760	6	66892760	9.55171e-08
	6_66892825	6	66892825	9.55171e-08
	6_66892832	6	66892832	9.55171e-08
	6_66892837	6	66892837	9.55171e-08
	6_66892840	6	66892840	9.55171e-08
	6_66892904	6	66892904	9.55171e-08
	6_66892941	6	66892941	9.55171e-08
	6_66892957	6	66892957	9.55171e-08
	6_66892976	6	66892976	9.55171e-08
	6_66892985	6	66892985	9.55171e-08
	6_66893213	6	66893213	9.55171e-08
	6_66893334	6	66893334	9.55171e-08
	6_66893424	6	66893424	9.55171e-08
	6_66893447	6	66893447	9.55171e-08
	6_66893474	6	66893474	9.55171e-08
	6_66893532	6	66893532	9.55171e-08
	6_66893622	6	66893622	9.55171e-08
	6_66898428	6	66898428	1.19074e-07
	6_66899965	6	66899965	1.19074e-07
	6_66902455	6	66902455	1.19074e-07
	6_66902799	6	66902799	1.19074e-07
	6_66905382	6	66905382	1.19074e-07
	6_66910227	6	66910227	9.55171e-08
	6_66912522	6	66912522	1.19074e-07
	6_66915391	6	66915391	1.19074e-07
	6_66915991	6	66915991	1.19074e-07
	6_66916043	6	66916043	1.19074e-07
	6_66917053	6	66917053	1.19074e-07
	6_66918739	6	66918739	1.19074e-07
	6_66919101	6	66919101	1.19074e-07
	6_66920093	6	66920093	1.19074e-07
	6_67455996	6	67455996	2.14369e-07
	6_67523232	6	67523232	2.58313e-07
	6_67551303	6	67551303	1.09064e-07
	6_67592364	6	67592364	1.72844e-07
	6_67596362	6	67596362	2.77666e-07
	6_67626892	6	67626892	2.77666e-07
	6_68151635	6	68151635	9.35174e-08
	6_68153389	6	68153389	4.85698e-08
	6_68154407	6	68154407	4.85698e-08
	6_68155130	6	68155130	4.85698e-08
	6_68155923	6	68155923	4.85698e-08
	6_68197536	6	68197536	4.85698e-08
	6_68207387	6	68207387	1.09029e-07
	6_68207500	6	68207500	1.09029e-07
	6_68207509	6	68207509	1.25296e-07
	6_68208573	6	68208573	1.09029e-07
	6_68208643	6	68208643	1.09029e-07
	6_68260536	6	68260536	6.98054e-08
	6_68567425	6	68567425	1.38761e-07
	6_68567481	6	68567481	1.38761e-07
	6_68568571	6	68568571	1.09265e-07
	6_68568602	6	68568602	1.09265e-07
	6_68568603	6	68568603	1.09265e-07
	6_68568614	6	68568614	1.09265e-07
	6_68568803	6	68568803	1.09265e-07
	6_68577003	6	68577003	2.319e-07
	6_68577677	6	68577677	2.319e-07
	6_68577858	6	68577858	2.319e-07
	6_68578878	6	68578878	2.319e-07
	6_68584199	6	68584199	1.9683e-07
	6_68607541	6	68607541	1.96664e-07
	6_68609791	6	68609791	1.96664e-07
	6_68627438	6	68627438	2.56551e-07
	6_68631197	6	68631197	2.56551e-07
	6_68660263	6	68660263	1.09029e-07
	6_68676398	6	68676398	3.79343e-08
	6_68679356	6	68679356	3.79343e-08
	6_68679820	6	68679820	3.79343e-08
	6_68682819	6	68682819	2.06278e-07
	6_68683643	6	68683643	2.06278e-07
	6_68685985	6	68685985	2.06278e-07
	6_68686762	6	68686762	2.06278e-07
	6_68687198	6	68687198	2.06278e-07
	6_68689849	6	68689849	2.06278e-07
	6_68691207	6	68691207	2.06278e-07
	6_68692553	6	68692553	2.06278e-07
	6_68692711	6	68692711	2.06278e-07
	6_68743701	6	68743701	2.06278e-07
	6_68743753	6	68743753	2.06278e-07
	6_68744409	6	68744409	2.06278e-07
	6_68745871	6	68745871	2.06278e-07
	6_68745910	6	68745910	1.0915e-07
	6_68749233	6	68749233	2.06278e-07
	6_68767469	6	68767469	2.06278e-07
	6_68768692	6	68768692	2.06278e-07
	6_68769455	6	68769455	2.06278e-07
	6_68769507	6	68769507	1.0915e-07
	6_68772177	6	68772177	2.06278e-07
	6_68776105	6	68776105	2.06278e-07
	6_68776106	6	68776106	2.06278e-07
	6_68777814	6	68777814	2.06278e-07
	6_68781101	6	68781101	2.06278e-07
	6_68784270	6	68784270	2.06278e-07
	6_68785223	6	68785223	2.06278e-07
	6_68789930	6	68789930	2.06278e-07
	6_68790032	6	68790032	2.06278e-07
	6_68790129	6	68790129	2.06278e-07
	6_68790287	6	68790287	2.06278e-07
	6_68792386	6	68792386	2.06278e-07
	6_68792804	6	68792804	2.06278e-07
	6_68794243	6	68794243	5.30905e-08
	6_68796651	6	68796651	5.30905e-08
	6_68796680	6	68796680	5.30905e-08
	6_68796710	6	68796710	5.30905e-08
	6_68800199	6	68800199	5.30905e-08
	6_68800653	6	68800653	5.30905e-08
	6_68801747	6	68801747	5.30905e-08
	6_68802135	6	68802135	5.30905e-08
	6_68802183	6	68802183	5.30905e-08
	6_68802321	6	68802321	5.30905e-08
	6_68802582	6	68802582	5.30905e-08
	6_68802605	6	68802605	5.30905e-08
	6_68802714	6	68802714	5.30905e-08
	6_68802798	6	68802798	5.30905e-08
	6_68802862	6	68802862	5.30905e-08
	6_68802910	6	68802910	5.30905e-08
	6_68802938	6	68802938	5.30905e-08
	6_68802973	6	68802973	5.30905e-08
	6_68804211	6	68804211	5.30905e-08
	6_68807216	6	68807216	5.30905e-08
	6_69076195	6	69076195	2.06278e-07
	6_69092047	6	69092047	2.06278e-07
	6_69092098	6	69092098	2.06278e-07
	6_69102682	6	69102682	5.30905e-08
	6_69103754	6	69103754	3.20383e-08
	6_69153937	6	69153937	5.30905e-08
	6_69164350	6	69164350	6.97326e-08
	6_69218062	6	69218062	1.75752e-07
	6_69219652	6	69219652	1.75752e-07
	6_69249863	6	69249863	1.75752e-07
	6_69255597	6	69255597	1.75752e-07
	6_69256777	6	69256777	1.75752e-07
	6_69260157	6	69260157	2.06278e-07
	6_69272801	6	69272801	1.75752e-07
	6_69281291	6	69281291	1.75752e-07
	6_69284166	6	69284166	1.75752e-07
	6_69284198	6	69284198	1.75752e-07
	6_69292101	6	69292101	1.75752e-07
	6_69292102	6	69292102	1.75752e-07
	6_69294064	6	69294064	1.75752e-07
	6_69360186	6	69360186	2.06278e-07
	6_69371098	6	69371098	2.06278e-07
	6_69371189	6	69371189	2.06278e-07
	6_69371198	6	69371198	2.06278e-07
	6_69382292	6	69382292	2.06278e-07
	6_69386705	6	69386705	2.06278e-07
	6_69390644	6	69390644	2.06278e-07
	6_69404747	6	69404747	2.06278e-07
	6_69405540	6	69405540	2.06278e-07
	6_69405640	6	69405640	2.06278e-07
	6_69406488	6	69406488	2.06278e-07
	6_69409092	6	69409092	2.06278e-07
	6_69410702	6	69410702	2.06278e-07
	6_69411697	6	69411697	2.06278e-07
	6_69412314	6	69412314	2.06278e-07
	6_69412376	6	69412376	2.06278e-07
	6_69412435	6	69412435	2.06278e-07
	6_69415320	6	69415320	2.06278e-07
	6_69421302	6	69421302	2.06278e-07
	6_69425974	6	69425974	2.06278e-07
	6_69426378	6	69426378	2.06278e-07
	6_69428623	6	69428623	2.06278e-07
	6_69433497	6	69433497	2.06278e-07
	6_69433947	6	69433947	2.06278e-07
	6_69434806	6	69434806	2.06278e-07
	6_69437487	6	69437487	2.06278e-07
	6_69438648	6	69438648	2.06278e-07
	6_69439239	6	69439239	2.06278e-07
	6_69439259	6	69439259	2.06278e-07
	6_69449444	6	69449444	2.06278e-07
	6_69449522	6	69449522	2.06278e-07
	6_69451248	6	69451248	2.06278e-07
	6_69453338	6	69453338	2.06278e-07
	6_69454706	6	69454706	2.06278e-07
	6_69455827	6	69455827	2.06278e-07
	6_69456218	6	69456218	2.06278e-07
	6_69456372	6	69456372	2.06278e-07
	6_69456452	6	69456452	2.06278e-07
	6_69456856	6	69456856	2.06278e-07
	6_69457752	6	69457752	2.06278e-07
	6_69458688	6	69458688	2.06278e-07
	6_69458871	6	69458871	2.06278e-07
	6_69461942	6	69461942	2.06278e-07
	6_69462189	6	69462189	2.06278e-07
	6_69462402	6	69462402	2.06278e-07
	6_69463163	6	69463163	2.06278e-07
	6_69463616	6	69463616	2.06278e-07
	6_69464712	6	69464712	2.06278e-07
	6_69465205	6	69465205	2.06278e-07
	6_69467509	6	69467509	2.06278e-07
	6_69479957	6	69479957	2.06278e-07
	6_69480059	6	69480059	2.06278e-07
	6_69480725	6	69480725	2.06278e-07
	6_69480786	6	69480786	2.06278e-07
	6_69481360	6	69481360	2.06278e-07
	6_69481457	6	69481457	2.06278e-07
	6_69482237	6	69482237	2.06278e-07
	6_69482812	6	69482812	2.06278e-07
	6_69482988	6	69482988	2.06278e-07
	6_69505537	6	69505537	2.06278e-07
	6_69511823	6	69511823	2.06278e-07
	6_69541721	6	69541721	2.06278e-07
	6_69544089	6	69544089	2.06278e-07
	6_69548409	6	69548409	2.06278e-07
	6_69551161	6	69551161	2.06278e-07
	6_69551208	6	69551208	2.06278e-07
	6_69552461	6	69552461	2.06278e-07
	6_69553084	6	69553084	2.06278e-07
	6_69553182	6	69553182	2.06278e-07
	6_69553230	6	69553230	2.06278e-07
	6_69555447	6	69555447	2.06278e-07
	6_69555747	6	69555747	2.06278e-07
	6_69556099	6	69556099	2.06278e-07
	6_69556318	6	69556318	2.06278e-07
	6_69556747	6	69556747	2.06278e-07
	6_69556967	6	69556967	2.06278e-07
	6_69559720	6	69559720	2.06278e-07
	6_69562417	6	69562417	2.06278e-07
	6_69563462	6	69563462	2.06278e-07
	6_69563464	6	69563464	2.06278e-07
	6_69569321	6	69569321	2.06278e-07
	6_69570170	6	69570170	2.06278e-07
	6_69570344	6	69570344	2.06278e-07
	6_69571029	6	69571029	2.06278e-07
	6_69571485	6	69571485	2.06278e-07
	6_69571850	6	69571850	2.06278e-07
	6_69572063	6	69572063	2.06278e-07
	6_69576696	6	69576696	2.06278e-07
	6_69602416	6	69602416	2.06278e-07
	6_69602627	6	69602627	2.06278e-07
	6_69602826	6	69602826	2.06278e-07
	6_69604520	6	69604520	2.06278e-07
	6_69605410	6	69605410	2.06278e-07
	6_69612863	6	69612863	2.06278e-07
	6_69613106	6	69613106	2.06278e-07
	6_69613776	6	69613776	2.06278e-07
	6_69615210	6	69615210	2.06278e-07
	6_69615520	6	69615520	2.06278e-07
	6_69617448	6	69617448	2.06278e-07
	6_69618780	6	69618780	2.06278e-07
	6_69619955	6	69619955	2.06278e-07
	6_69654236	6	69654236	2.06278e-07
	6_69680963	6	69680963	2.06278e-07
	6_69706786	6	69706786	2.06278e-07
	6_69725165	6	69725165	2.06278e-07
	6_69740295	6	69740295	2.06278e-07
	6_69742626	6	69742626	2.06278e-07
	6_69742753	6	69742753	2.06278e-07
	6_69744240	6	69744240	2.06278e-07
	6_69745381	6	69745381	2.06278e-07
	6_69746409	6	69746409	2.06278e-07
	6_69747210	6	69747210	2.06278e-07
	6_69747687	6	69747687	2.06278e-07
	6_69765287	6	69765287	2.06278e-07
	6_69774981	6	69774981	2.06278e-07
	6_69778081	6	69778081	2.06278e-07
	6_69781785	6	69781785	2.06278e-07
	6_69783078	6	69783078	2.06278e-07
	6_69850811	6	69850811	2.06278e-07
	6_69869337	6	69869337	2.06278e-07
	6_69869705	6	69869705	2.06278e-07
	6_69871051	6	69871051	2.06278e-07
	6_69871916	6	69871916	2.06278e-07
	6_69872963	6	69872963	2.06278e-07
	6_69873469	6	69873469	2.06278e-07
	6_69888833	6	69888833	2.06278e-07
	6_69893277	6	69893277	2.06278e-07
	6_69896107	6	69896107	2.06278e-07
	6_69903037	6	69903037	2.06278e-07
	6_69906960	6	69906960	2.3528e-07
	6_69912005	6	69912005	2.06278e-07
	6_69912065	6	69912065	2.06278e-07
	6_69912224	6	69912224	2.06278e-07
	6_69914175	6	69914175	2.06278e-07
	6_69914617	6	69914617	2.06278e-07
	6_69914674	6	69914674	2.06278e-07
	6_69914922	6	69914922	2.06278e-07
	6_69915247	6	69915247	2.06278e-07
	6_69916935	6	69916935	2.06278e-07
	6_69917244	6	69917244	2.06278e-07
	6_69918988	6	69918988	2.06278e-07
	6_69919062	6	69919062	2.06278e-07
	6_69919435	6	69919435	2.06278e-07
	6_69919843	6	69919843	2.06278e-07
	6_69919890	6	69919890	2.06278e-07
	6_69923304	6	69923304	2.06278e-07
	6_69928824	6	69928824	2.06278e-07
	6_69933094	6	69933094	2.06278e-07
	6_69936899	6	69936899	2.06278e-07
	6_69937613	6	69937613	2.06278e-07
	6_69937735	6	69937735	2.06278e-07
	6_69938290	6	69938290	2.06278e-07
	6_69943154	6	69943154	2.06278e-07
	6_69946521	6	69946521	2.06278e-07
	6_69946873	6	69946873	2.06278e-07
	6_69948374	6	69948374	2.06278e-07
	6_69950717	6	69950717	2.06278e-07
	6_69950718	6	69950718	2.06278e-07
	6_69954142	6	69954142	2.06278e-07
	6_69954924	6	69954924	2.06278e-07
	6_69955646	6	69955646	2.06278e-07
	6_69956796	6	69956796	2.06278e-07
	6_69958741	6	69958741	2.06278e-07
	6_69961692	6	69961692	2.06278e-07
	6_69962186	6	69962186	2.06278e-07
	6_69964678	6	69964678	2.06278e-07
	6_69965932	6	69965932	2.06278e-07
	6_69966421	6	69966421	2.06278e-07
	6_69967523	6	69967523	2.06278e-07
	6_69968011	6	69968011	2.06278e-07
	6_69969506	6	69969506	2.06278e-07
	6_69975460	6	69975460	2.06278e-07
	6_69977818	6	69977818	2.06278e-07
	6_69978058	6	69978058	2.06278e-07
	6_69980263	6	69980263	2.06278e-07
	6_69981827	6	69981827	2.06278e-07
	6_69987317	6	69987317	2.06278e-07
	6_69989263	6	69989263	2.06278e-07
	6_69992701	6	69992701	2.06278e-07
	6_69993616	6	69993616	2.06278e-07
	6_69996944	6	69996944	2.06278e-07
	6_70003607	6	70003607	2.06278e-07
	6_70006997	6	70006997	2.06278e-07
	6_70008902	6	70008902	2.06278e-07
	6_70009321	6	70009321	2.06278e-07
	6_70010972	6	70010972	2.06278e-07
	6_70011116	6	70011116	2.06278e-07
	6_70011797	6	70011797	2.06278e-07
	6_70012745	6	70012745	2.06278e-07
	6_70013003	6	70013003	2.06278e-07
	6_70015340	6	70015340	2.06278e-07
	6_70017020	6	70017020	2.06278e-07
	6_70017871	6	70017871	2.06278e-07
	6_70019185	6	70019185	2.06278e-07
	6_70027083	6	70027083	2.06278e-07
	6_70032111	6	70032111	2.06278e-07
	6_70037253	6	70037253	2.06278e-07
	6_70038817	6	70038817	2.06278e-07
	6_70038968	6	70038968	2.06278e-07
	6_70043288	6	70043288	2.06278e-07
	6_70053147	6	70053147	2.06278e-07
	6_70063661	6	70063661	2.06278e-07
	6_70064335	6	70064335	2.06278e-07
	6_70357669	6	70357669	2.66379e-07
	6_70360871	6	70360871	2.66379e-07
	6_70360952	6	70360952	2.66379e-07
	6_70360959	6	70360959	2.66379e-07
	6_70362231	6	70362231	2.66379e-07
	6_70363531	6	70363531	2.66379e-07
	6_70365068	6	70365068	2.66379e-07
	6_70365516	6	70365516	2.66379e-07
	6_70366033	6	70366033	2.66379e-07
	6_70366396	6	70366396	1.18487e-07
	6_70366655	6	70366655	2.66379e-07
	6_70366666	6	70366666	2.66379e-07
	6_70367357	6	70367357	2.66379e-07
	6_70368461	6	70368461	2.66379e-07
	6_70369385	6	70369385	2.66379e-07
	6_70369598	6	70369598	2.66379e-07
	6_70371371	6	70371371	2.66379e-07
	6_70373770	6	70373770	2.66379e-07
	6_70375680	6	70375680	2.66379e-07
	6_70377202	6	70377202	2.66379e-07
	6_70377225	6	70377225	4.36e-08
	6_70377632	6	70377632	1.18487e-07
	6_70377685	6	70377685	2.66379e-07
	6_70377807	6	70377807	2.66379e-07
	6_70378635	6	70378635	2.66379e-07
	6_70382693	6	70382693	2.66379e-07
	6_74234307	6	74234307	1.14099e-07
	6_74234422	6	74234422	1.14099e-07
	6_74234503	6	74234503	1.14099e-07
	6_74234710	6	74234710	1.14099e-07
	6_74234724	6	74234724	1.75756e-07
	6_150521698	6	150521698	2.27484e-07
	6_153745831	6	153745831	2.40062e-07
	6_153745864	6	153745864	2.40062e-07
	6_153747658	6	153747658	7.8441e-08
	6_153748824	6	153748824	2.40062e-07
	6_153749074	6	153749074	2.40062e-07
	6_153753546	6	153753546	2.40062e-07
	6_153753702	6	153753702	2.40062e-07
	6_153753756	6	153753756	2.40062e-07
	6_153753964	6	153753964	7.8441e-08
	6_153754331	6	153754331	7.8441e-08
	6_153800998	6	153800998	1.83209e-07
	6_153801065	6	153801065	1.83209e-07
	6_153801755	6	153801755	1.83209e-07
	6_153802124	6	153802124	7.68905e-08
	6_153802432	6	153802432	1.83209e-07
	6_153804340	6	153804340	6.45682e-08
	6_153804780	6	153804780	1.83209e-07
	6_153806518	6	153806518	1.83209e-07
	6_153806757	6	153806757	1.83209e-07
	6_153810607	6	153810607	1.3773e-07
	6_153814998	6	153814998	2.64833e-07
	6_153818143	6	153818143	2.64833e-07
	6_153822540	6	153822540	2.51511e-07
	6_153822560	6	153822560	2.51511e-07
	6_153822629	6	153822629	2.45424e-07
	6_153824425	6	153824425	5.42694e-08
	6_153853029	6	153853029	1.61991e-07
	6_153892555	6	153892555	2.38405e-07
	6_153899503	6	153899503	1.142e-07
	6_153899564	6	153899564	6.89834e-08
	6_153899604	6	153899604	6.89834e-08
	6_153899715	6	153899715	6.89834e-08
	6_153899764	6	153899764	6.89834e-08
	6_153899830	6	153899830	1.20701e-07
	6_153899888	6	153899888	1.20701e-07
	6_153899903	6	153899903	1.20701e-07
	6_153900046	6	153900046	1.20701e-07
	6_153900548	6	153900548	5.54953e-08
	6_153900560	6	153900560	5.54953e-08
	6_153900594	6	153900594	5.54953e-08
	6_153900662	6	153900662	5.54953e-08
	6_153900666	6	153900666	2.14818e-07
	6_153900749	6	153900749	2.14818e-07
	6_153900807	6	153900807	5.54953e-08
	6_153900825	6	153900825	2.14818e-07
	6_153900933	6	153900933	6.89834e-08
	6_153900951	6	153900951	2.14818e-07
	6_153901240	6	153901240	5.54953e-08
	6_153905462	6	153905462	2.7214e-07
	6_153916933	6	153916933	1.10434e-07
	6_153917923	6	153917923	1.9147e-07
	6_153917953	6	153917953	1.9147e-07
	6_153917960	6	153917960	1.9147e-07
	6_153923922	6	153923922	1.9147e-07
	6_153924998	6	153924998	1.9147e-07
	6_153925961	6	153925961	1.24186e-07
	6_153931440	6	153931440	1.24186e-07
	6_153931643	6	153931643	9.00391e-08
	6_153933708	6	153933708	1.94134e-07
	6_153933977	6	153933977	1.08647e-07
	6_153934409	6	153934409	1.6666e-07
	6_153934497	6	153934497	1.6666e-07
	6_153934530	6	153934530	6.2414e-08
	6_153934588	6	153934588	8.54234e-08
	6_153934593	6	153934593	8.54234e-08
	6_153934620	6	153934620	1.6666e-07
	6_153934860	6	153934860	1.6666e-07
	6_153935198	6	153935198	1.59295e-07
	6_153936031	6	153936031	1.65047e-07
	6_153936609	6	153936609	1.65047e-07
	6_153936845	6	153936845	1.9147e-07
	6_153938770	6	153938770	1.9147e-07
	6_153938808	6	153938808	1.65047e-07
	6_153939527	6	153939527	1.9147e-07
	6_153939890	6	153939890	1.9147e-07
	6_153940240	6	153940240	2.03093e-07
	6_153953539	6	153953539	3.00314e-07
	6_153954014	6	153954014	2.11533e-07
	6_153955620	6	153955620	9.12116e-08
	6_153955863	6	153955863	2.90741e-08
	6_153957534	6	153957534	6.17126e-08
	6_153959819	6	153959819	1.9147e-07
	6_153960882	6	153960882	8.67942e-08
	6_153961841	6	153961841	8.58158e-08
	6_153962032	6	153962032	1.59363e-07
	6_153962413	6	153962413	8.58158e-08
	6_153962649	6	153962649	8.58158e-08
	6_153963053	6	153963053	7.91615e-08
	6_153963076	6	153963076	1.61666e-07
	6_153963229	6	153963229	2.92648e-07
	6_153963323	6	153963323	7.47636e-08
	6_153963778	6	153963778	4.68566e-08
	6_153963830	6	153963830	1.67497e-07
	6_153963908	6	153963908	1.70198e-07
	6_153964642	6	153964642	1.71336e-08
	6_153964704	6	153964704	7.28497e-08
	6_153964744	6	153964744	1.71336e-08
	6_153965298	6	153965298	4.68566e-08
	6_153966291	6	153966291	4.68566e-08
	6_153966296	6	153966296	7.53721e-08
	6_153966685	6	153966685	2.40743e-08
	6_153966710	6	153966710	2.40743e-08
	6_153966756	6	153966756	1.4773e-08
	6_153967939	6	153967939	1.32058e-07
	6_153968048	6	153968048	1.32058e-07
	6_153968101	6	153968101	1.32058e-07
	6_153968121	6	153968121	1.32058e-07
	6_153976363	6	153976363	2.32072e-07
	6_153977216	6	153977216	2.01591e-07
	6_153990809	6	153990809	2.95124e-07
	6_153992292	6	153992292	2.95124e-07
	6_153992298	6	153992298	2.95124e-07
	6_153992552	6	153992552	2.95124e-07
	6_153992688	6	153992688	2.95124e-07
	6_153993319	6	153993319	2.68203e-07
	6_153993559	6	153993559	2.68203e-07
	6_154003539	6	154003539	2.7738e-07
	6_154013651	6	154013651	1.71355e-07
	14_118583268	14	118583268	2.32077e-07
	14_119428840	14	119428840	2.81974e-07
	14_119437907	14	119437907	2.81974e-07
	14_119437924	14	119437924	2.81974e-07
	14_120330222	14	120330222	2.62174e-07
	14_120357132	14	120357132	1.3842e-07
	14_120358918	14	120358918	1.3842e-07
	14_120359955	14	120359955	1.3842e-07
	14_120360756	14	120360756	1.3842e-07
	14_120360785	14	120360785	1.3842e-07
	14_120360796	14	120360796	1.3842e-07
	14_120360819	14	120360819	1.3842e-07
	14_120360870	14	120360870	1.3842e-07
	14_120360882	14	120360882	1.3842e-07
	14_120360934	14	120360934	1.3842e-07
	14_120360973	14	120360973	1.3842e-07
	14_120361122	14	120361122	1.3842e-07
	14_120361143	14	120361143	1.3842e-07
	14_120361211	14	120361211	1.3842e-07
	14_120361292	14	120361292	1.3842e-07
	14_120361429	14	120361429	1.3842e-07
	17_16078377	17	16078377	2.41465e-07
	17_16141992	17	16141992	8.40823e-08
	17_16142772	17	16142772	1.43395e-07
	17_23084166	17	23084166	9.99325e-08
	17_34637351	17	34637351	3.02144e-07
	17_34758105	17	34758105	1.92173e-07
h°	1_6615079	1	6615079	1.39215e-07
	1_32736620	1	32736620	3.29703e-08
	1_125236555	1	125236555	1.00302e-07
	1_125236750	1	125236750	1.10496e-07
	1_125237557	1	125237557	1.39161e-07
	1_125239164	1	125239164	1.26586e-07
	1_125247464	1	125247464	7.99094e-08
	1_125458865	1	125458865	2.68386e-07
	1_125466254	1	125466254	3.01237e-07
	1_125470269	1	125470269	1.99935e-07
	1_125472319	1	125472319	1.99935e-07
	1_125472832	1	125472832	3.01237e-07
	1_125473919	1	125473919	1.99935e-07
	1_125473920	1	125473920	1.99935e-07
	1_125480873	1	125480873	3.01237e-07
	1_125482127	1	125482127	2.86591e-07
	1_125493851	1	125493851	1.69559e-07
	1_125493857	1	125493857	8.87423e-08
	1_125498359	1	125498359	2.86591e-07
	1_125506044	1	125506044	3.01237e-07
	1_131796623	1	131796623	6.24328e-08
	10_60238284	10	60238284	2.3405e-07
	13_184791200	13	184791200	1.40577e-07
	13_184793039	13	184793039	1.40577e-07
	16_9073912	16	9073912	1.44694e-07
	16_9074253	16	9074253	1.44694e-07
	16_9074281	16	9074281	1.83712e-07
	16_9074393	16	9074393	1.17546e-07
	16_9074484	16	9074484	1.17546e-07
	16_9074587	16	9074587	1.17546e-07
	16_9074607	16	9074607	1.17546e-07
	16_9084006	16	9084006	1.83712e-07
	16_18111466	16	18111466	2.08141e-07
	2_71469230	2	71469230	6.97092e-08
	2_71564360	2	71564360	6.97092e-08
	2_76392146	2	76392146	1.28888e-07
	2_76463773	2	76463773	8.6795e-08
	2_82969344	2	82969344	2.71265e-07
	2_83698362	2	83698362	8.04867e-08
	2_83699500	2	83699500	1.42184e-07
	2_83699815	2	83699815	1.46273e-07
	2_83699905	2	83699905	2.48537e-07
	2_83700898	2	83700898	2.83946e-07
	2_85213446	2	85213446	1.46199e-07
	2_85214062	2	85214062	1.46199e-07
	2_85214831	2	85214831	1.46199e-07
	2_85214922	2	85214922	1.46199e-07
	2_85215036	2	85215036	1.46199e-07
	2_85215065	2	85215065	1.46199e-07
	2_85215066	2	85215066	1.46199e-07
	2_85215107	2	85215107	1.46199e-07
	2_85215245	2	85215245	1.46199e-07
	2_85215295	2	85215295	1.46199e-07
	2_85215376	2	85215376	1.46199e-07
	2_85215496	2	85215496	1.46199e-07
	2_85215504	2	85215504	1.46199e-07
	2_85215549	2	85215549	1.46199e-07
	2_85215681	2	85215681	1.46199e-07
	2_85215916	2	85215916	1.46199e-07
	2_86143570	2	86143570	1.7685e-07
	2_103407325	2	103407325	1.78786e-07
	2_106392347	2	106392347	1.64905e-07
	2_106551313	2	106551313	2.17416e-07
	2_106552328	2	106552328	2.17416e-07
	2_106554680	2	106554680	2.17416e-07
	2_106561344	2	106561344	2.17416e-07
	2_106570303	2	106570303	2.17416e-07
	2_106570526	2	106570526	2.17416e-07
	2_106595703	2	106595703	2.03658e-07
	2_106605637	2	106605637	8.98996e-08
	2_106607294	2	106607294	3.04574e-07
	2_106638266	2	106638266	2.03658e-07
	2_106642558	2	106642558	8.98996e-08
	2_106643228	2	106643228	8.98996e-08
	2_106647633	2	106647633	2.03658e-07
	2_106651630	2	106651630	8.98996e-08
	2_106670139	2	106670139	8.98996e-08
	2_106678672	2	106678672	2.03658e-07
	2_106690186	2	106690186	2.59299e-07
	2_106694302	2	106694302	1.12822e-07
	2_106702697	2	106702697	2.95491e-07
	2_106707137	2	106707137	2.95491e-07
	2_106759087	2	106759087	2.54289e-07
	2_106772406	2	106772406	1.37026e-07
	2_106784028	2	106784028	7.79063e-08
	2_106804905	2	106804905	9.89878e-08
	2_106814134	2	106814134	5.7482e-08
	2_106827384	2	106827384	3.4681e-08
	2_106834930	2	106834930	3.4681e-08
	2_106847891	2	106847891	3.4681e-08
	2_106854609	2	106854609	9.89878e-08
	2_106873435	2	106873435	1.7995e-07
	2_106874027	2	106874027	1.7995e-07
	2_106874187	2	106874187	9.89878e-08
	2_106888038	2	106888038	1.7995e-07
	2_106888789	2	106888789	1.7995e-07
	2_106889087	2	106889087	1.7995e-07
	2_106891396	2	106891396	1.7995e-07
	2_106895298	2	106895298	1.7995e-07
	2_106895416	2	106895416	1.7995e-07
	2_106895439	2	106895439	1.7995e-07
	2_106896169	2	106896169	1.7995e-07
	2_106896272	2	106896272	1.7995e-07
	2_106896694	2	106896694	9.89878e-08
	2_106897410	2	106897410	1.7995e-07
	2_106898373	2	106898373	1.7995e-07
	2_106900343	2	106900343	1.7995e-07
	2_106901662	2	106901662	1.7995e-07
	2_106901674	2	106901674	1.7995e-07
	2_106901691	2	106901691	1.7995e-07
	2_106902026	2	106902026	1.7995e-07
	2_106902194	2	106902194	1.7995e-07
	2_106902283	2	106902283	1.7995e-07
	2_106902563	2	106902563	1.7995e-07
	2_106902645	2	106902645	1.7995e-07
	2_106902718	2	106902718	1.7995e-07
	2_106902874	2	106902874	1.7995e-07
	2_106902911	2	106902911	1.7995e-07
	2_106903214	2	106903214	1.7995e-07
	2_106903298	2	106903298	9.89878e-08
	2_106903777	2	106903777	1.7995e-07
	2_106903802	2	106903802	1.7995e-07
	2_106904102	2	106904102	1.7995e-07
	2_106904109	2	106904109	1.7995e-07
	2_106904184	2	106904184	1.7995e-07
	2_106904222	2	106904222	1.7995e-07
	2_106904262	2	106904262	9.89878e-08
	2_106904336	2	106904336	1.7995e-07
	2_106904392	2	106904392	1.7995e-07
	2_106904475	2	106904475	1.7995e-07
	2_106904620	2	106904620	1.7995e-07
	2_106904852	2	106904852	1.7995e-07
	2_106904855	2	106904855	1.7995e-07
	2_106904882	2	106904882	1.7995e-07
	2_106905263	2	106905263	1.7995e-07
	2_106905349	2	106905349	9.89878e-08
	2_106905427	2	106905427	1.7995e-07
	2_106905627	2	106905627	1.7995e-07
	2_106905631	2	106905631	1.7995e-07
	2_106905813	2	106905813	1.7995e-07
	2_106906047	2	106906047	1.7995e-07
	2_106906135	2	106906135	1.7995e-07
	2_106906554	2	106906554	1.7995e-07
	2_106906663	2	106906663	1.7995e-07
	2_106906897	2	106906897	1.7995e-07
	2_106906958	2	106906958	1.7995e-07
	2_106906991	2	106906991	9.89878e-08
	2_106908259	2	106908259	1.7995e-07
	2_106908672	2	106908672	9.89878e-08
	2_106908762	2	106908762	1.7995e-07
	2_106908895	2	106908895	9.89878e-08
	2_106909247	2	106909247	3.4681e-08
	2_106909499	2	106909499	9.89878e-08
	2_106909677	2	106909677	9.89878e-08
	2_106909738	2	106909738	9.89878e-08
	2_106909921	2	106909921	1.6636e-07
	2_106909990	2	106909990	9.89878e-08
	2_106910135	2	106910135	9.89878e-08
	2_106911071	2	106911071	9.89878e-08
	2_106911310	2	106911310	9.89878e-08
	2_106913335	2	106913335	9.89878e-08
	2_106913924	2	106913924	9.89878e-08
	2_106913965	2	106913965	9.89878e-08
	2_106914069	2	106914069	9.89878e-08
	2_106914078	2	106914078	9.89878e-08
	2_106914183	2	106914183	9.89878e-08
	2_106914348	2	106914348	9.89878e-08
	2_106914379	2	106914379	9.89878e-08
	2_106914519	2	106914519	9.89878e-08
	2_106914526	2	106914526	9.89878e-08
	2_106914839	2	106914839	9.89878e-08
	2_106914973	2	106914973	8.07143e-08
	2_106915097	2	106915097	9.89878e-08
	2_106915115	2	106915115	9.89878e-08
	2_106915124	2	106915124	9.89878e-08
	2_106915135	2	106915135	9.89878e-08
	2_106915268	2	106915268	1.92571e-07
	2_106915378	2	106915378	9.89878e-08
	2_106915970	2	106915970	9.89878e-08
	2_106916107	2	106916107	9.89878e-08
	2_106916864	2	106916864	9.89878e-08
	2_106916939	2	106916939	9.89878e-08
	2_106917102	2	106917102	9.89878e-08
	2_106917165	2	106917165	9.89878e-08
	2_106917339	2	106917339	9.89878e-08
	2_106917903	2	106917903	1.92571e-07
	2_106918183	2	106918183	1.92571e-07
	2_106918534	2	106918534	1.92571e-07
	2_106918823	2	106918823	1.92571e-07
	2_106919000	2	106919000	1.92571e-07
	2_106919891	2	106919891	1.92571e-07
	2_106920649	2	106920649	1.92571e-07
	2_106921279	2	106921279	1.92571e-07
	2_106921341	2	106921341	1.92571e-07
	2_106921481	2	106921481	1.92571e-07
	2_107543160	2	107543160	3.03223e-07
	2_107550580	2	107550580	3.03223e-07
	2_107557700	2	107557700	3.03223e-07
	2_108389094	2	108389094	2.17416e-07
	2_108390066	2	108390066	2.17416e-07
	2_108400318	2	108400318	2.17416e-07
	2_108400452	2	108400452	2.17416e-07
	2_108400783	2	108400783	2.17416e-07
	2_108400894	2	108400894	2.17416e-07
	2_108401161	2	108401161	2.17416e-07
	2_108404556	2	108404556	2.17416e-07
	2_108944801	2	108944801	2.15158e-07
	2_108944891	2	108944891	2.15158e-07
	2_108965808	2	108965808	2.15158e-07
	2_108999685	2	108999685	2.15158e-07
	2_109023052	2	109023052	2.15158e-07
	2_109028878	2	109028878	2.15158e-07
	2_109035304	2	109035304	2.15158e-07
	2_109040358	2	109040358	2.15158e-07
	2_109080435	2	109080435	2.15158e-07
	2_109084808	2	109084808	2.15158e-07
	2_112653547	2	112653547	2.3469e-08
	2_112685659	2	112685659	5.82538e-08
	2_119287753	2	119287753	1.856e-07
	2_119288439	2	119288439	1.856e-07
	2_119288485	2	119288485	1.856e-07
	2_119288630	2	119288630	2.11477e-07
	2_119289096	2	119289096	1.856e-07
	2_119296312	2	119296312	1.856e-07
	4_9073628	4	9073628	3.01414e-07
	4_9074694	4	9074694	3.01414e-07
	4_106943957	4	106943957	1.34582e-07
	4_106945510	4	106945510	1.34582e-07
	4_106948964	4	106948964	1.34582e-07
	4_106952067	4	106952067	1.83155e-07
	4_106952086	4	106952086	1.83155e-07
	4_106952381	4	106952381	9.17568e-08
	4_106956881	4	106956881	2.10308e-07
	4_106961201	4	106961201	2.10308e-07
	4_106961304	4	106961304	2.10308e-07
	4_106962473	4	106962473	2.10308e-07
	4_106962521	4	106962521	2.10308e-07
	4_106962523	4	106962523	2.10308e-07
	4_106962524	4	106962524	2.10308e-07
	4_106962537	4	106962537	2.10308e-07
	4_106962572	4	106962572	2.10308e-07
	4_106962610	4	106962610	2.10308e-07
	4_106962650	4	106962650	2.10308e-07
	4_106962673	4	106962673	2.10308e-07
	4_106962678	4	106962678	2.10308e-07
	4_106962688	4	106962688	2.10308e-07
	4_106962701	4	106962701	2.10308e-07
	4_106962709	4	106962709	2.10308e-07
	4_106962867	4	106962867	1.75877e-07
	4_106962913	4	106962913	2.10308e-07
	4_106964022	4	106964022	2.10308e-07
	4_106964693	4	106964693	1.06157e-07
	4_106965662	4	106965662	1.06157e-07
	4_106967798	4	106967798	8.98233e-08
	4_107123525	4	107123525	8.9356e-08
	4_107124426	4	107124426	1.36635e-07
	4_107129034	4	107129034	1.15232e-07
	4_107129172	4	107129172	1.26278e-07
	4_107129548	4	107129548	1.15232e-07
	4_107129586	4	107129586	2.666e-07
	4_107129787	4	107129787	2.666e-07
	4_107130065	4	107130065	1.26278e-07
	4_107130639	4	107130639	1.26278e-07
	4_107130811	4	107130811	1.26278e-07
	4_107131121	4	107131121	1.26278e-07
	4_107131259	4	107131259	1.26278e-07
	4_107131410	4	107131410	1.26278e-07
	4_107131435	4	107131435	1.26278e-07
	4_107131469	4	107131469	1.26278e-07
	4_107131513	4	107131513	1.26278e-07
	4_107131557	4	107131557	1.26278e-07
	4_107131994	4	107131994	1.26278e-07
	4_107133473	4	107133473	2.22787e-07
	4_107133802	4	107133802	2.22787e-07
	4_107134091	4	107134091	2.22787e-07
	4_107134261	4	107134261	2.22787e-07
	4_107135456	4	107135456	2.11786e-07
	4_107135558	4	107135558	1.85199e-07
	4_107136057	4	107136057	2.83501e-07
	4_107136248	4	107136248	2.22787e-07
	4_107136336	4	107136336	2.22787e-07
	4_107136372	4	107136372	2.22787e-07
	4_107136528	4	107136528	2.22787e-07
	4_107136575	4	107136575	2.22787e-07
	4_107136585	4	107136585	2.22787e-07
	4_107136695	4	107136695	2.22787e-07
	4_107137619	4	107137619	2.22787e-07
	4_107137759	4	107137759	2.22787e-07
	4_107137796	4	107137796	2.22787e-07
	4_107137826	4	107137826	2.22787e-07
	4_107138664	4	107138664	2.22787e-07
	4_107139403	4	107139403	2.22787e-07
	4_107139482	4	107139482	2.22787e-07
	4_107139503	4	107139503	2.22787e-07
	4_107141320	4	107141320	2.22787e-07
	4_107141607	4	107141607	2.22787e-07
	4_107141710	4	107141710	2.22787e-07
	4_107141741	4	107141741	2.22787e-07
	4_107141776	4	107141776	1.62826e-07
	4_107142029	4	107142029	1.46541e-07
	4_107142146	4	107142146	2.41455e-07
	4_107142386	4	107142386	2.34055e-07
	4_107142610	4	107142610	2.22787e-07
	4_107142784	4	107142784	2.22787e-07
	4_107143213	4	107143213	2.22787e-07
	4_107144112	4	107144112	2.22787e-07
	4_107144171	4	107144171	2.22787e-07
	4_107144188	4	107144188	2.22787e-07
	4_107144203	4	107144203	2.22787e-07
	4_107144250	4	107144250	1.38334e-07
	4_107144523	4	107144523	1.38334e-07
	4_107144539	4	107144539	1.38334e-07
	4_107144613	4	107144613	2.17144e-07
	4_107144623	4	107144623	2.17144e-07
	7_24660161	7	24660161	2.21536e-07

## Sheet: TableS2
Table S2. The candidate genes associated with meat color traits in pigs
Trait	SNP	Chr	Strand	Ensembl ID	Gene ID
L*	3_6002588	3	-	ENSSSCG00000007605	TMEM130
	3_6002588	3	+	ENSSSCG00000007606	TRRAP
	3_6002588	3	-	ENSSSCG00000030153	SMURF1
	3_6002588	3	-	ENSSSCG00000007607	KPNA7
	3_6002588	3	+	ENSSSCG00000007609	ENSSSCG00000007609
	6_2992189	6	-	ENSSSCG00000034980	IRF8
	6_2992189	6	-	ENSSSCG00000029034	COX4I1
	6_2992189	6	+	ENSSSCG00000045808	ENSSSCG00000045808
	6_2992189	6	+	ENSSSCG00000029403	ENSSSCG00000029403
	9_122912114	9	+	ENSSSCG00000015543	CACNA1E
	11_6188381	11	+	ENSSSCG00000025996	ENSSSCG00000025996
	11_6188381	11	-	ENSSSCG00000009322	SLC46A3
	15_135135922	15	+	ENSSSCG00000034692	SH3BP4
	15_135250924	15	+	ENSSSCG00000016317	AGAP1
a*	6_65876337	6	+	ENSSSCG00000031344	AJAP1
	6_66800541	6	-	ENSSSCG00000029843	NPHP4
	6_66800541	6	+	ENSSSCG00000020749	KCNAB2
	6_68676398	6	-	ENSSSCG00000003386	TNFRSF9
	6_68676398	6	+	ENSSSCG00000035376	ENSSSCG00000035376
	6_68676398	6	+	ENSSSCG00000028572	ENSSSCG00000028572
	6_68676398	6	+	ENSSSCG00000046937	ENSSSCG00000046937
	6_68676398	6	-	ENSSSCG00000040531	ENSSSCG00000040531
	6_68676398	6	+	ENSSSCG00000003385	PARK7
	6_68676398	6	-	ENSSSCG00000035774	ERRFI1
	6_68745910	6	+	ENSSSCG00000003388	SLC45A1
	6_68769507	6	-	ENSSSCG00000033497	ENSSSCG00000033497
	6_153966756	6	+	ENSSSCG00000003830	MYSM1
	6_153966756	6	+	ENSSSCG00000003832	TACSTD2
	6_153966756	6	+	ENSSSCG00000003831	OMA1
	10_60227983	10	+	ENSSSCG00000011117	UPF2
	10_60227983	10	-	ENSSSCG00000022247	PROSER2
	10_60227983	10	-	ENSSSCG00000011119	ECHDC3
	10_60227983	10	+	ENSSSCG00000011120	USP6NL
	10_60227983	10	+	ENSSSCG00000046967	ENSSSCG00000046967
	14_48805995	14	+	ENSSSCG00000010036	SLC5A1
	14_48805995	14	-	ENSSSCG00000042192	ENSSSCG00000042192
	14_48805995	14	-	ENSSSCG00000010039	SLC5A4
	14_48805995	14	+	ENSSSCG00000035443	ENSSSCG00000035443
	14_48805995	14	+	ENSSSCG00000040522	ENSSSCG00000040522
	14_48805995	14	+	ENSSSCG00000031037	ENSSSCG00000031037
	14_48805995	14	+	ENSSSCG00000032042	ENSSSCG00000032042
	14_48805995	14	+	ENSSSCG00000039180	ENSSSCG00000039180
	14_48805995	14	+	ENSSSCG00000025508	ENSSSCG00000025508
	14_48805995	14	-	ENSSSCG00000033879	ZNF280B
	14_48805995	14	-	ENSSSCG00000034651	ENSSSCG00000034651
	14_48805995	14	-	ENSSSCG00000036408	ENSSSCG00000036408
	14_48805995	14	+	ENSSSCG00000038719	ENSSSCG00000038719
	14_48805995	14	+	ENSSSCG00000048147	ENSSSCG00000048147
	14_48805995	14	+	ENSSSCG00000042270	ENSSSCG00000042270
	14_48805995	14	+	ENSSSCG00000030830	ENSSSCG00000030830
	14_48805995	14	+	ENSSSCG00000037214	ENSSSCG00000037214
b*	6_66804782	6	-	ENSSSCG00000029843	NPHP4
	6_66804782	6	+	ENSSSCG00000020749	KCNAB2
	6_150445038	6	-	ENSSSCG00000039793	PATJ
	6_150445038	6	+	ENSSSCG00000038861	TM2D1
	6_150982839	6	-	ENSSSCG00000023243	NFIA
	6_151038395	6	+	ENSSSCG00000033042	ENSSSCG00000033042
	6_153615195	6	+	ENSSSCG00000003830	MYSM1
	6_154914716	6	+	ENSSSCG00000003833	DAB1
	6_155210604	6	+	ENSSSCG00000003834	C8B
	6_155294032	6	-	ENSSSCG00000003835	C8A
	6_155294032	6	+	ENSSSCG00000038041	FYB2
	15_130725485	15	-	ENSSSCG00000016258	DNER
	15_130725485	15	-	ENSSSCG00000024373	TRIP12
	15_130829530	15	+	ENSSSCG00000016259	FBXO36
	15_130829530	15	-	ENSSSCG00000016260	SLC16A14
	15_134038873	15	+	ENSSSCG00000009432	DGKD
	15_134038873	15	-	ENSSSCG00000016306	USP40
	15_134038873	15	+	ENSSSCG00000036274	ENSSSCG00000036274
	15_134038873	15	-	ENSSSCG00000028217	ENSSSCG00000028217
	15_134038873	15	+	ENSSSCG00000016305	MROH2A
	15_134038873	15	-	ENSSSCG00000016313	HJURP
	15_134038873	15	+	ENSSSCG00000016314	TRPM8
C*	6_41151093	6	-	ENSSSCG00000025214	TSHZ3
	6_65876337	6	+	ENSSSCG00000031344	AJAP1
	6_66690642	6	-	ENSSSCG00000029843	NPHP4
	6_66765692	6	+	ENSSSCG00000020749	KCNAB2
	6_66817834	6	-	ENSSSCG00000003366	CHD5
	6_66892628	6	-	ENSSSCG00000003369	RPL22
	6_66910227	6	+	ENSSSCG00000003368	RNF207
	6_67455996	6	-	ENSSSCG00000034297	HES2
	6_67455996	6	+	ENSSSCG00000003374	ESPN
	6_67455996	6	-	ENSSSCG00000003376	PLEKHG5
	6_67455996	6	-	ENSSSCG00000040001	TNFRSF25
	6_67455996	6	-	ENSSSCG00000030253	NOL9
	6_67455996	6	+	ENSSSCG00000003382	TAS1R1
	6_67455996	6	+	ENSSSCG00000003383	ZBTB48
	6_67455996	6	-	ENSSSCG00000003379	KLHL21
	6_67455996	6	+	ENSSSCG00000027869	PHF13
	6_67455996	6	+	ENSSSCG00000036876	THAP3
	6_67455996	6	-	ENSSSCG00000003384	DNAJC11
	6_67455996	6	+	ENSSSCG00000036772	CAMTA1
	6_68197536	6	-	ENSSSCG00000003386	TNFRSF9
	6_68567425	6	+	ENSSSCG00000035376	ENSSSCG00000035376
	6_68567425	6	+	ENSSSCG00000028572	ENSSSCG00000028572
	6_68567425	6	+	ENSSSCG00000046937	ENSSSCG00000046937
	6_68567425	6	-	ENSSSCG00000040531	ENSSSCG00000040531
	6_68567425	6	+	ENSSSCG00000003385	PARK7
	6_68567425	6	-	ENSSSCG00000035774	ERRFI1
	6_68743701	6	+	ENSSSCG00000003388	SLC45A1
	6_68767469	6	-	ENSSSCG00000033497	ENSSSCG00000033497
	6_69218062	6	-	ENSSSCG00000022343	ENO1
	6_69249863	6	+	ENSSSCG00000003391	CA6
	6_69292101	6	-	ENSSSCG00000003390	SLC2A7
	6_69360186	6	-	ENSSSCG00000039651	SLC2A5
	6_69360186	6	-	ENSSSCG00000033456	GPR157
	6_69467509	6	+	ENSSSCG00000034502	H6PD
	6_69541721	6	+	ENSSSCG00000035940	SPSB1
	6_69740295	6	+	ENSSSCG00000038006	SLC25A33
	6_69774981	6	+	ENSSSCG00000003393	TMEM201
	6_69850811	6	+	ENSSSCG00000003395	PIK3CD
	6_69888833	6	-	ENSSSCG00000003396	CLSTN1
	6_69987317	6	-	ENSSSCG00000036868	CTNNBIP1
	6_70063661	6	-	ENSSSCG00000033257	LZIC
	6_70357669	6	+	ENSSSCG00000003400	NMNAT1
	6_70357669	6	+	ENSSSCG00000003399	RBP7
	6_70357669	6	+	ENSSSCG00000003398	UBE4B
	6_70357669	6	+	ENSSSCG00000003401	KIF1B
	6_74234307	6	+	ENSSSCG00000037676	KAZN
	6_74234307	6	-	ENSSSCG00000043303	ENSSSCG00000043303
	6_74234307	6	+	ENSSSCG00000021026	TMEM51
	6_150521698	6	-	ENSSSCG00000039793	PATJ
	6_150521698	6	+	ENSSSCG00000038861	TM2D1
	6_153745831	6	+	ENSSSCG00000003830	MYSM1
	6_153745831	6	+	ENSSSCG00000003832	TACSTD2
	6_153745831	6	+	ENSSSCG00000003831	OMA1
	14_119428840	14	+	ENSSSCG00000046631	ENSSSCG00000046631
	14_119428840	14	-	ENSSSCG00000050431	ENSSSCG00000050431
	14_120330222	14	-	ENSSSCG00000010620	XPNPEP1
	14_120330222	14	+	ENSSSCG00000010621	ADD3
	17_16078377	17	+	ENSSSCG00000025527	ENSSSCG00000025527
	17_23084166	17	+	ENSSSCG00000030112	MACROD2
	17_23084166	17	-	ENSSSCG00000007079	FLRT3
	17_23084166	17	-	ENSSSCG00000043127	ENSSSCG00000043127
	17_34637351	17	-	ENSSSCG00000007200	FAM110A
	17_34637351	17	+	ENSSSCG00000007199	SLC52A3
	17_34637351	17	+	ENSSSCG00000039028	SCRT2
	17_34637351	17	+	ENSSSCG00000023298	SRXN1
	17_34637351	17	+	ENSSSCG00000036940	TCF15
	17_34637351	17	+	ENSSSCG00000007203	ENSSSCG00000007203
	17_34637351	17	+	ENSSSCG00000036081	TBC1D20
	17_34637351	17	-	ENSSSCG00000007206	RBCK1
	17_34637351	17	-	ENSSSCG00000039862	TRIB3
	17_34758105	17	-	ENSSSCG00000031519	NRSN2
	17_34758105	17	+	ENSSSCG00000007212	C20orf96
	17_34758105	17	-	ENSSSCG00000038183	ENSSSCG00000038183
	17_34758105	17	-	ENSSSCG00000007218	DEFB129
	17_34758105	17	-	ENSSSCG00000035759	DEFB127
h°	1_6615079	1	+	ENSSSCG00000004032	PRKN
	1_6615079	1	+	ENSSSCG00000004033	AGPAT4
	1_32736620	1	+	ENSSSCG00000004199	EPB41L2
	1_32736620	1	-	ENSSSCG00000033538	SMLR1
	1_125236555	1	-	ENSSSCG00000050164	ENSSSCG00000050164
	1_125480873	1	+	ENSSSCG00000045481	ENSSSCG00000045481
	1_125480873	1	-	ENSSSCG00000051796	ENSSSCG00000051796
	1_131796623	1	+	ENSSSCG00000040418	FSIP1
	1_131796623	1	-	ENSSSCG00000046035	ENSSSCG00000046035
	1_131796623	1	-	ENSSSCG00000004789	THBS1
	2_71469230	2	+	ENSSSCG00000013591	TIMM44
	2_71469230	2	+	ENSSSCG00000036220	CTXN1
	2_71469230	2	-	ENSSSCG00000013589	SNAPC2
	2_71469230	2	-	ENSSSCG00000040598	TGFBR3L
	2_71469230	2	-	ENSSSCG00000013588	MAP2K7
	2_71469230	2	-	ENSSSCG00000013586	LRRC8E
	2_71469230	2	+	ENSSSCG00000013584	PRR36
	2_71469230	2	-	ENSSSCG00000013585	EVI5L
	2_71469230	2	+	ENSSSCG00000046934	ENSSSCG00000046934
	2_71469230	2	+	ENSSSCG00000013579	CD209
	2_71469230	2	+	ENSSSCG00000039007	ENSSSCG00000039007
	2_71469230	2	+	ENSSSCG00000040377	FCER2
	2_71469230	2	-	ENSSSCG00000013573	TRAPPC5
	2_71469230	2	+	ENSSSCG00000037188	PCP2
	2_71469230	2	-	ENSSSCG00000033183	ENSSSCG00000033183
	2_71469230	2	-	ENSSSCG00000013575	RETN
	2_71469230	2	-	ENSSSCG00000013576	STXBP2
	2_71469230	2	-	ENSSSCG00000034876	PET100
	2_71469230	2	+	ENSSSCG00000013582	XAB2
	2_71469230	2	-	ENSSSCG00000013583	CAMSAP3
	2_71469230	2	-	ENSSSCG00000013572	PNPLA6
	2_71469230	2	-	ENSSSCG00000013570	MCOLN1
	2_71469230	2	-	ENSSSCG00000025078	ZNF358
	2_71469230	2	-	ENSSSCG00000013571	TEX45
	2_71469230	2	+	ENSSSCG00000013569	PEX11G
	2_71469230	2	-	ENSSSCG00000013568	ENSSSCG00000013568
	2_76392146	2	-	ENSSSCG00000028363	TMPRSS9
	2_76392146	2	-	ENSSSCG00000013464	SPPL2B
	2_76392146	2	+	ENSSSCG00000013463	LSM7
	2_76392146	2	+	ENSSSCG00000013462	LINGO3
	2_76392146	2	+	ENSSSCG00000013461	PEAK3
	2_76392146	2	-	ENSSSCG00000013460	OAZ1
	2_76392146	2	+	ENSSSCG00000013457	DOT1L
	2_76392146	2	-	ENSSSCG00000013453	ENSSSCG00000013453
	2_76392146	2	+	ENSSSCG00000035812	AMH
	2_76392146	2	-	ENSSSCG00000031899	JSRP1
	2_76392146	2	+	ENSSSCG00000040157	AP3D1
	2_76392146	2	-	ENSSSCG00000013455	IZUMO4
	2_76392146	2	+	ENSSSCG00000032366	MOB3A
	2_76392146	2	+	ENSSSCG00000013448	MKNK2
	2_76392146	2	+	ENSSSCG00000013444	BTBD2
	2_76392146	2	-	ENSSSCG00000013445	CSNK1G2
	2_76463773	2	-	ENSSSCG00000013446	SCAMP4
	2_76463773	2	-	ENSSSCG00000038810	ADAT3
	2_76463773	2	-	ENSSSCG00000025631	ENSSSCG00000025631
	2_76463773	2	+	ENSSSCG00000013442	ABHD17A
	2_82969344	2	+	ENSSSCG00000028317	ARHGEF28
	2_83698362	2	-	ENSSSCG00000014072	ENC1
	2_83698362	2	+	ENSSSCG00000014073	HEXB
	2_83698362	2	-	ENSSSCG00000014074	GFM2
	2_83698362	2	+	ENSSSCG00000014075	NSA2
	2_83698362	2	-	ENSSSCG00000014076	FAM169A
	2_85213446	2	+	ENSSSCG00000034062	SV2C
	2_85213446	2	+	ENSSSCG00000014088	IQGAP2
	2_86143570	2	+	ENSSSCG00000014094	ENSSSCG00000014094
	2_86143570	2	-	ENSSSCG00000041248	ENSSSCG00000041248
	2_86143570	2	+	ENSSSCG00000014097	ENSSSCG00000014097
	2_86143570	2	-	ENSSSCG00000014098	WDR41
	2_103407325	2	+	ENSSSCG00000014170	CAST
	2_103407325	2	-	ENSSSCG00000014171	ERAP1
	2_103407325	2	+	ENSSSCG00000027860	ERAP2
	2_103407325	2	+	ENSSSCG00000014173	LNPEP
	2_106392347	2	+	ENSSSCG00000014179	FAM174A
	2_106561344	2	-	ENSSSCG00000035539	ST8SIA4
	2_107557700	2	-	ENSSSCG00000033364	ENSSSCG00000033364
	2_108389094	2	+	ENSSSCG00000014184	PAM
	2_108389094	2	-	ENSSSCG00000051195	ENSSSCG00000051195
	2_108389094	2	-	ENSSSCG00000025287	GIN1
	2_108389094	2	+	ENSSSCG00000024999	PPIP5K2
	2_108944801	2	+	ENSSSCG00000038779	MACIR
	2_108944801	2	+	ENSSSCG00000048901	ENSSSCG00000048901
	2_108944801	2	+	ENSSSCG00000049923	ENSSSCG00000049923
	2_108944801	2	-	ENSSSCG00000014186	ENSSSCG00000014186
	2_108944801	2	-	ENSSSCG00000014187	NUDT12
	2_108944801	2	-	ENSSSCG00000047052	ENSSSCG00000047052
	2_112653547	2	-	ENSSSCG00000036520	EFNA5
	2_119287753	2	-	ENSSSCG00000014214	TRIM36
	2_119287753	2	-	ENSSSCG00000014215	PGGT1B
	2_119287753	2	-	ENSSSCG00000029866	CCDC112
	4_9073628	4	+	ENSSSCG00000005953	KCNQ3
	4_9073628	4	+	ENSSSCG00000022257	HHLA1
	4_9073628	4	+	ENSSSCG00000005954	ENSSSCG00000005954
	4_9073628	4	-	ENSSSCG00000005955	EFR3A
	4_106943957	4	+	ENSSSCG00000006764	PTPN22
	4_106943957	4	+	ENSSSCG00000030154	RSBN1
	4_106943957	4	+	ENSSSCG00000006766	PHTF1
	4_106943957	4	-	ENSSSCG00000006767	MAGI3
	7_24660161	7	+	ENSSSCG00000038570	ENSSSCG00000038570
	7_24660161	7	-	ENSSSCG00000001444	ENSSSCG00000001444
	7_24660161	7	-	ENSSSCG00000038892	ENSSSCG00000038892
	7_24660161	7	-	ENSSSCG00000030874	ENSSSCG00000030874
	7_24660161	7	-	ENSSSCG00000033414	ENSSSCG00000033414
	7_24660161	7	-	ENSSSCG00000027921	ENSSSCG00000027921
	7_24660161	7	+	ENSSSCG00000001447	ENSSSCG00000001447
	7_24660161	7	-	ENSSSCG00000025071	BTNL2
	7_24660161	7	+	ENSSSCG00000001453	HLA-DRA
	10_60238284	10	+	ENSSSCG00000011117	UPF2
	10_60238284	10	-	ENSSSCG00000022247	PROSER2
	10_60238284	10	-	ENSSSCG00000011119	ECHDC3
	10_60238284	10	+	ENSSSCG00000011120	USP6NL
	10_60238284	10	+	ENSSSCG00000046967	ENSSSCG00000046967
	16_18111466	16	+	ENSSSCG00000030991	ENSSSCG00000030991
	16_18111466	16	+	ENSSSCG00000042498	ENSSSCG00000042498
	16_18111466	16	+	ENSSSCG00000016810	ENSSSCG00000016810

## Sheet: TableS3
Table S3. The QTL enrichment results of each meat color trait-associated SNPs
Trait	QTL	Chr	FDR	QTL type
L*	Mean corpuscular hemoglobin content	3	0.0330898	Health
	Carcass weight (hot)	3	0.00608764	Meat and Carcass
	Meat color b*	3	0.0430747	Meat and Carcass
	Meat color OPTO	3	0.0151586	Meat and Carcass
	Meat color a*	6	0.0225735	Meat and Carcass
	Backfat at mid-back	9	0.0225735	Meat and Carcass
	Percentage type IIb fibers	11	0.00608764	Meat and Carcass
	tenderness score	15	0.0108711	Meat and Carcass
	Teat number	11	0.00608764	Reproduction
	Cryptorchidism	11	0.0430747	Reproduction
a*	Aspartate aminotransferase activity	14	4.3183e-17	Health
	Creatinine level	14	0.0125527	Health
	Backfat at last rib	14	0.00547287	Meat and Carcass
	Carcass weight (cold)	14	0.0125527	Meat and Carcass
	Conductivity 24 hours post-mortem	6	0.00690193	Meat and Carcass
	Dressing percentage	6	0.00383469	Meat and Carcass
	Empty body protein content	6	0.0428141	Meat and Carcass
	Ham weight	14	0.0285323	Meat and Carcass
	Linoleic acid content	14	0.0125527	Meat and Carcass
	Adipocyte diameter	14	0.00371077	Meat and Carcass
	Fat androstenone level	14	0.0170736	Meat and Carcass
	Ham percentage	14	0.0125527	Meat and Carcass
	Percentage type I fibers	14	0.0285323	Meat and Carcass
	Shear force at first peak	14	0.00141528	Meat and Carcass
b*	Conductivity 24 hours post-mortem	6	0.00474408	Meat and Carcass
	Dressing percentage	6	0.00345044	Meat and Carcass
	tenderness score	15	0.0219388	Meat and Carcass
C*	Aspartate aminotransferase activity	14	5.15096e-19	Health
	Eosinophil number	17	0.00182493	Health
	Adipocyte diameter	14	0.0011689	Meat and Carcass
	Backfat at last rib	14	0.00192422	Meat and Carcass
	Carcass length	14	0.0460102	Meat and Carcass
	Carcass weight (cold)	14	0.00713532	Meat and Carcass
	Conductivity 24 hours post-mortem	6	0.0271239	Meat and Carcass
	Dressing percentage	6	0.0135084	Meat and Carcass
	Fat androstenone level	14	0.00713532	Meat and Carcass
	Ham weight	14	0.0162841	Meat and Carcass
	Ham percentage	14	0.00713532	Meat and Carcass
	Percentage type I fibers	14	0.0162841	Meat and Carcass
	Shear force at first peak	14	0.000394486	Meat and Carcass
	Number weaned	6	3.0679e-05	Reproduction
	Weaning to conception interval	6	0.0060007	Reproduction
h°	PRRSV antibody titer	7	0.0187385	Health
	Actinobacillus pleuropneumoniae susceptibility	2	0.0120469	Health
	C3c concentration	2	0.0194096	Health
	Hemolytic complement activity (classical pathway)	4	6.46918e-05	Health
	Average backfat thickness	7	1.4462e-07	Meat and Carcass
	Backfat at last lumbar	7	0.0294382	Meat and Carcass
	Backfat at last rib	7	0.0472802	Meat and Carcass
	backfat at P2 position	1	0.0472802	Meat and Carcass
	Carcass weight (hot)	1	0.00539584	Meat and Carcass
	Conductivity 24 hours postmortem (ham)	16	0.0472802	Meat and Carcass
	Meat color a*	7	0.0120469	Meat and Carcass
	PH for Longissmus dorsi	1	4.72499e-06	Meat and Carcass
	pH for Semimembranosus	7	0.0425876	Meat and Carcass
	Shear force	2	2.17022e-44	Meat and Carcass
	Shoulder subcutaneous fat thickness	1	0.0472802	Meat and Carcass
	chew score	2	0.0139067	Meat and Carcass
	Conductivity 45 minutes post-mortem	7	0.000130402	Meat and Carcass
	Cooking loss	2	0.000440749	Meat and Carcass
	Fat percentage in carcass	2	0.00552797	Meat and Carcass
	Flavor score	2	0.00552797	Meat and Carcass
	Juiciness score	2	0.00335313	Meat and Carcass
	Off-flavor score	2	0.0060999	Meat and Carcass
	tenderness score	2	0.000422214	Meat and Carcass
	Fat androstenone level	7	0.0472802	Meat and Carcass
	NADP-malate dehydrogenase activity	7	0.00211232	Meat and Carcass
	NADPH-generating enzyme activity	7	0.0194096	Meat and Carcass

## Sheet: TableS4
Table S4. The candidate genes overlapped with selection signatures detected in Group 1
Chr	Start	End	strand	Ensembl ID	Gene ID
2	11120001	11170000	-	ENSSSCG00000032893	MS4A13
2	51390001	51440000	+	ENSSSCG00000034569	OBSCN
2	51580001	51630000	+	ENSSSCG00000046223	ENSSSCG00000046223
2	52400001	52450000	+	ENSSSCG00000013973	ENSSSCG00000013973
2	58810001	58860000	-	ENSSSCG00000049430	ARMC6
2	58810001	58860000	+	ENSSSCG00000025839	SUGP2
2	58890001	58940000	+	ENSSSCG00000013919	ENSSSCG00000013919
2	58890001	58940000	-	ENSSSCG00000025329	DDX49
2	58890001	58940000	+	ENSSSCG00000027840	ENSSSCG00000027840
2	59080001	59130000	-	ENSSSCG00000013915	CRTC1
2	59120001	59170000	-	ENSSSCG00000013913	KLHL26
2	59260001	59310000	+	ENSSSCG00000013905	FKBP8
2	59260001	59310000	+	ENSSSCG00000040181	ELL
2	59320001	59370000	+	ENSSSCG00000040524	ISYNA1
2	59320001	59370000	-	ENSSSCG00000025955	SSBP4
2	59360001	59410000	+	ENSSSCG00000036963	LRRC25
2	59360001	59410000	-	ENSSSCG00000034260	GDF15
2	59370001	59420000	-	ENSSSCG00000039684	PGPEP1
2	61490001	61540000	-	ENSSSCG00000013850	ENSSSCG00000013850
2	61490001	61540000	-	ENSSSCG00000013851	ENSSSCG00000013851
2	61500001	61550000	+	ENSSSCG00000013852	ENSSSCG00000013852
2	65640001	65690000	+	ENSSSCG00000047920	ENSSSCG00000047920
2	66900001	66950000	-	ENSSSCG00000013714	ENSSSCG00000013714
2	66900001	66950000	-	ENSSSCG00000045115	ENSSSCG00000045115
2	84590001	84640000	+	ENSSSCG00000014082	POLK
2	84590001	84640000	+	ENSSSCG00000014083	ANKDD1B
2	102580001	102630000	-	ENSSSCG00000014168	ELL2
2	102960001	103010000	-	ENSSSCG00000014169	PCSK1
2	105170001	105220000	-	ENSSSCG00000014177	CHD1
2	108530001	108580000	+	ENSSSCG00000014184	PAM
2	108530001	108580000	-	ENSSSCG00000025287	GIN1
2	108540001	108590000	+	ENSSSCG00000024999	PPIP5K2
2	108610001	108660000	-	ENSSSCG00000049232	ENSSSCG00000049232
2	108610001	108660000	-	ENSSSCG00000043322	ENSSSCG00000043322
2	111120001	111170000	-	ENSSSCG00000051043	ENSSSCG00000051043
2	114460001	114510000	-	ENSSSCG00000022845	PJA2
8	36300001	36350000	-	ENSSSCG00000028922	GABRA2
8	50360001	50410000	-	ENSSSCG00000027183	FSTL5
8	53600001	53650000	+	ENSSSCG00000038890	SMIM31
8	53660001	53710000	+	ENSSSCG00000031750	ENSSSCG00000031750
8	60720001	60770000	+	ENSSSCG00000026129	ADGRL3
8	60750001	60800000	+	ENSSSCG00000031193	ENSSSCG00000031193
8	65880001	65930000	-	ENSSSCG00000008932	TMPRSS11B
8	65880001	65930000	-	ENSSSCG00000008935	ENSSSCG00000008935
8	65920001	65970000	-	ENSSSCG00000022140	TMPRSS11E
8	65950001	66000000	+	ENSSSCG00000035505	YTHDC1
8	66100001	66150000	-	ENSSSCG00000037635	ENSSSCG00000037635
8	66150001	66200000	-	ENSSSCG00000040980	ENSSSCG00000040980
8	66150001	66200000	-	ENSSSCG00000034735	ENSSSCG00000034735
8	66670001	66720000	-	ENSSSCG00000034976	ENSSSCG00000034976
8	66680001	66730000	-	ENSSSCG00000032374	SULT1B1
8	104410001	104460000	+	ENSSSCG00000009106	PDE5A
8	104420001	104470000	+	ENSSSCG00000047510	ENSSSCG00000047510
8	104420001	104470000	+	ENSSSCG00000037272	FABP2
8	104450001	104500000	+	ENSSSCG00000031773	ENSSSCG00000031773
8	104450001	104500000	-	ENSSSCG00000023174	USP53
8	104550001	104600000	-	ENSSSCG00000032838	MYOZ2
9	70090001	70140000	+	ENSSSCG00000043318	ENSSSCG00000043318
9	70090001	70140000	-	ENSSSCG00000048369	ENSSSCG00000048369
9	70670001	70720000	+	ENSSSCG00000015307	CDK14
9	73590001	73640000	+	ENSSSCG00000015323	GNGT1
9	73590001	73640000	-	ENSSSCG00000044095	ENSSSCG00000044095
9	73630001	73680000	-	ENSSSCG00000015322	TFPI2
9	84250001	84300000	-	ENSSSCG00000015355	DGKB
9	84600001	84650000	-	ENSSSCG00000015356	AGMO
9	85610001	85660000	-	ENSSSCG00000015358	CRPPA
9	91450001	91500000	-	ENSSSCG00000015383	RAPGEF5
9	91460001	91510000	+	ENSSSCG00000020970	IL6
9	91520001	91570000	-	ENSSSCG00000015384	TOMM7
9	93580001	93630000	+	ENSSSCG00000015394	KIAA1324L
13	16320001	16370000	+	ENSSSCG00000036381	RBMS3
13	27790001	27840000	-	ENSSSCG00000022462	ENSSSCG00000022462
13	27790001	27840000	+	ENSSSCG00000032596	ENSSSCG00000032596
13	27790001	27840000	+	ENSSSCG00000022195	ZKSCAN7
13	38800001	38850000	-	ENSSSCG00000030359	ARHGEF3
13	39680001	39730000	+	ENSSSCG00000038873	SLMAP
13	92490001	92540000	+	ENSSSCG00000011720	MBNL1
13	95670001	95720000	-	ENSSSCG00000025316	ENSSSCG00000025316
13	113870001	113920000	+	ENSSSCG00000023871	NAALADL2
13	128470001	128520000	+	ENSSSCG00000031478	OSTN
13	160960001	161010000	-	ENSSSCG00000042338	ENSSSCG00000042338
13	160960001	161010000	-	ENSSSCG00000011986	OR5K4
13	160970001	161020000	-	ENSSSCG00000049619	ENSSSCG00000049619
4	24790001	24840000	+	ENSSSCG00000031031	CSMD3
4	28820001	28870000	-	ENSSSCG00000006032	EMC2
4	29240001	29290000	+	ENSSSCG00000006033	EIF3E
4	33930001	33980000	-	ENSSSCG00000006053	BAALC
4	34010001	34060000	-	ENSSSCG00000006054	ATP6V1C1
4	35510001	35560000	-	ENSSSCG00000006060	GRHL2
4	69570001	69620000	+	ENSSSCG00000022092	CYP7B1
15	37990001	38040000	+	ENSSSCG00000020934	SPAG11
15	37990001	38040000	+	ENSSSCG00000034077	ENSSSCG00000034077
15	37990001	38040000	+	ENSSSCG00000039995	ENSSSCG00000039995
15	37990001	38040000	+	ENSSSCG00000032248	ENSSSCG00000032248
15	38530001	38580000	-	ENSSSCG00000023328	GPM6A
15	44220001	44270000	+	ENSSSCG00000015774	TENM3
15	44600001	44650000	+	ENSSSCG00000021731	WWC2
15	44750001	44800000	-	ENSSSCG00000033315	ENSSSCG00000033315
15	44760001	44810000	-	ENSSSCG00000027901	CLDN22
15	44760001	44810000	-	ENSSSCG00000022456	ENSSSCG00000022456
15	44840001	44890000	+	ENSSSCG00000015779	CDKN2AIP
15	44870001	44920000	+	ENSSSCG00000024555	ING2
15	44930001	44980000	-	ENSSSCG00000015776	RWDD4
15	44940001	44990000	+	ENSSSCG00000015777	TRAPPC11
15	45080001	45130000	+	ENSSSCG00000015780	STOX2
15	45630001	45680000	-	ENSSSCG00000015782	IRF2
15	45720001	45770000	+	ENSSSCG00000015786	PRIMPOL
15	45720001	45770000	-	ENSSSCG00000034012	CASP3
15	45780001	45830000	-	ENSSSCG00000015785	CENPU
15	45820001	45870000	-	ENSSSCG00000015784	ACSL1
15	46340001	46390000	+	ENSSSCG00000015789	SNX25
15	46340001	46390000	-	ENSSSCG00000015792	LRP2BP
15	46440001	46490000	+	ENSSSCG00000015798	ANKRD37
15	46440001	46490000	-	ENSSSCG00000015793	UFSP2
15	46440001	46490000	+	ENSSSCG00000015794	C4orf47
15	46450001	46500000	-	ENSSSCG00000015795	ENSSSCG00000015795
15	46470001	46520000	-	ENSSSCG00000015796	PDLIM3
15	46540001	46590000	-	ENSSSCG00000036679	SORBS2
15	56900001	56950000	+	ENSSSCG00000016393	ENSSSCG00000016393
15	56920001	56970000	-	ENSSSCG00000016392	ENSSSCG00000016392
15	78040001	78090000	-	ENSSSCG00000015949	SLC25A12
15	78040001	78090000	+	ENSSSCG00000015952	HAT1
15	78050001	78100000	+	ENSSSCG00000015951	METAP1D
15	83590001	83640000	-	ENSSSCG00000038903	ENSSSCG00000038903
15	96820001	96870000	-	ENSSSCG00000016064	TMEFF2
6	19080001	19130000	+	ENSSSCG00000021519	CPNE2
6	19080001	19130000	-	ENSSSCG00000034414	PSME3IP1
6	19110001	19160000	+	ENSSSCG00000002820	RSPRY1
6	63950001	64000000	-	ENSSSCG00000028530	TMEM52
6	63950001	64000000	-	ENSSSCG00000030513	CFAP74
6	93920001	93970000	-	ENSSSCG00000003642	INPP5B
6	93920001	93970000	-	ENSSSCG00000003643	SF3A3
6	93940001	93990000	-	ENSSSCG00000003644	FHL3
6	93950001	94000000	+	ENSSSCG00000003645	UTP11
6	115480001	115530000	+	ENSSSCG00000023686	TTR
6	115480001	115530000	-	ENSSSCG00000025005	B4GALT6
6	162360001	162410000	+	ENSSSCG00000031300	AGBL4
11	63030001	63080000	+	ENSSSCG00000009489	GPC6
11	63690001	63740000	-	ENSSSCG00000009491	TGDS
11	63690001	63740000	+	ENSSSCG00000009492	GPR180
11	64060001	64110000	-	ENSSSCG00000026996	ENSSSCG00000026996
14	9450001	9500000	-	ENSSSCG00000009652	KCTD9
14	9470001	9520000	+	ENSSSCG00000009653	CDCA2
7	31470001	31520000	-	ENSSSCG00000001549	FKBP5
7	33820001	33870000	-	ENSSSCG00000037507	BTBD9
7	33820001	33870000	-	ENSSSCG00000051766	ENSSSCG00000051766
7	38330001	38380000	+	ENSSSCG00000027796	SLC22A7
7	38330001	38380000	-	ENSSSCG00000001672	CRIP3
7	38330001	38380000	-	ENSSSCG00000001667	ZNF318
7	57670001	57720000	-	ENSSSCG00000001872	LINGO1
7	58210001	58260000	+	ENSSSCG00000001880	SIN3A
7	58210001	58260000	+	ENSSSCG00000001881	MAN2C1
7	58220001	58270000	-	ENSSSCG00000001882	NEIL1
7	58230001	58280000	-	ENSSSCG00000001884	COMMD4
7	58350001	58400000	-	ENSSSCG00000001885	C15orf39
7	76590001	76640000	-	ENSSSCG00000033721	ENSSSCG00000033721
7	76590001	76640000	-	ENSSSCG00000022512	TRDC
7	93150001	93200000	+	ENSSSCG00000002309	PLEKHD1
1	85880001	85930000	-	ENSSSCG00000004465	BCKDHB
1	102770001	102820000	+	ENSSSCG00000040836	DCC
1	202000001	202050000	-	ENSSSCG00000028406	FOCAD
3	87090001	87140000	-	ENSSSCG00000025224	ENSSSCG00000025224
3	87090001	87140000	+	ENSSSCG00000047389	ENSSSCG00000047389
17	37680001	37730000	+	ENSSSCG00000007275	RALY
17	37680001	37730000	-	ENSSSCG00000038457	ENSSSCG00000038457
17	37680001	37730000	-	ENSSSCG00000007278	AHCY
17	62550001	62600000	-	ENSSSCG00000036706	SRMS
17	62550001	62600000	-	ENSSSCG00000038405	STMN3
17	62550001	62600000	+	ENSSSCG00000038651	FNDC11
17	62550001	62600000	-	ENSSSCG00000040107	GMEB2
17	62810001	62860000	-	ENSSSCG00000034186	SAMD10
17	62810001	62860000	+	ENSSSCG00000029119	PRPF6
17	62820001	62870000	+	ENSSSCG00000036804	TCEA2
17	62820001	62870000	-	ENSSSCG00000037865	SOX18
17	62840001	62890000	-	ENSSSCG00000034841	RGS19
17	62850001	62900000	+	ENSSSCG00000031228	OPRL1
17	62850001	62900000	-	ENSSSCG00000033548	LKAAEAR1
17	62860001	62910000	-	ENSSSCG00000037868	NPBWR2
16	1820001	1870000	-	ENSSSCG00000050328	ENSSSCG00000050328
5	49810001	49860000	+	ENSSSCG00000000567	SOX5
5	54940001	54990000	+	ENSSSCG00000040822	RERGL
12	2700001	2750000	+	ENSSSCG00000039498	RBFOX3

## Sheet: TableS5
Table S4. The candidate genes overlapped with selection signatures detected in Group 2
Chr	Start	End	strand	Ensembl ID	Gene ID
2	52410001	52460000	+	ENSSSCG00000013973	ENSSSCG00000013973
2	55160001	55210000	-	ENSSSCG00000037896	ENSSSCG00000037896
2	55220001	55270000	-	ENSSSCG00000036934	ENSSSCG00000036934
2	58810001	58860000	-	ENSSSCG00000049430	ARMC6
2	58810001	58860000	+	ENSSSCG00000025839	SUGP2
2	59110001	59160000	-	ENSSSCG00000013915	CRTC1
2	59130001	59180000	-	ENSSSCG00000013913	KLHL26
2	59180001	59230000	-	ENSSSCG00000013911	TMEM59L
2	59180001	59230000	+	ENSSSCG00000013909	CRLF1
2	59190001	59240000	-	ENSSSCG00000040666	REX1BD
2	59190001	59240000	-	ENSSSCG00000013906	ENSSSCG00000013906
2	59210001	59260000	+	ENSSSCG00000013905	FKBP8
2	59230001	59280000	+	ENSSSCG00000040181	ELL
2	59320001	59370000	+	ENSSSCG00000040524	ISYNA1
2	59320001	59370000	-	ENSSSCG00000025955	SSBP4
2	59360001	59410000	+	ENSSSCG00000036963	LRRC25
2	59360001	59410000	-	ENSSSCG00000034260	GDF15
2	59370001	59420000	-	ENSSSCG00000039684	PGPEP1
2	61440001	61490000	-	ENSSSCG00000013848	RAB8A
2	61440001	61490000	-	ENSSSCG00000013853	HSH2D
2	61440001	61490000	-	ENSSSCG00000013849	TPM4
2	61440001	61490000	-	ENSSSCG00000013850	ENSSSCG00000013850
2	61480001	61530000	-	ENSSSCG00000013851	ENSSSCG00000013851
2	61500001	61550000	+	ENSSSCG00000013852	ENSSSCG00000013852
2	63560001	63610000	+	ENSSSCG00000046513	ENSSSCG00000046513
2	64380001	64430000	+	ENSSSCG00000036342	ENSSSCG00000036342
2	65630001	65680000	+	ENSSSCG00000047920	ENSSSCG00000047920
2	65800001	65850000	+	ENSSSCG00000013754	ENSSSCG00000013754
2	66570001	66620000	-	ENSSSCG00000021757	ENSSSCG00000021757
2	66580001	66630000	-	ENSSSCG00000041142	ENSSSCG00000041142
2	74570001	74620000	+	ENSSSCG00000013496	SIRT6
2	74570001	74620000	-	ENSSSCG00000013501	CREB3L3
2	74850001	74900000	+	ENSSSCG00000013495	ZFR2
2	74850001	74900000	+	ENSSSCG00000013494	MATK
2	74850001	74900000	+	ENSSSCG00000032429	RAX2
2	74880001	74930000	-	ENSSSCG00000024242	MRPL54
2	74890001	74940000	+	ENSSSCG00000013492	APBA3
2	74890001	74940000	-	ENSSSCG00000013491	TJP3
2	84580001	84630000	+	ENSSSCG00000014082	POLK
2	84580001	84630000	+	ENSSSCG00000014083	ANKDD1B
2	85970001	86020000	+	ENSSSCG00000014094	ENSSSCG00000014094
2	85970001	86020000	+	ENSSSCG00000014097	ENSSSCG00000014097
2	102550001	102600000	-	ENSSSCG00000014168	ELL2
2	108540001	108590000	-	ENSSSCG00000025287	GIN1
2	108540001	108590000	+	ENSSSCG00000024999	PPIP5K2
2	111120001	111170000	-	ENSSSCG00000051043	ENSSSCG00000051043
2	116940001	116990000	-	ENSSSCG00000014207	APC
2	125600001	125650000	-	ENSSSCG00000014232	LOX
2	140000001	140050000	-	ENSSSCG00000029125	FAM13B
2	140010001	140060000	-	ENSSSCG00000040026	ENSSSCG00000040026
8	33040001	33090000	+	ENSSSCG00000008801	SLC30A9
8	45870001	45920000	+	ENSSSCG00000032722	GLRB
8	46030001	46080000	+	ENSSSCG00000024685	GRIA2
8	46960001	47010000	-	ENSSSCG00000008873	GASK1B
8	50670001	50720000	-	ENSSSCG00000027183	FSTL5
8	55150001	55200000	+	ENSSSCG00000022882	EXOC1L
8	55150001	55200000	+	ENSSSCG00000023269	EXOC1
8	60650001	60700000	+	ENSSSCG00000026129	ADGRL3
8	60750001	60800000	+	ENSSSCG00000031193	ENSSSCG00000031193
8	64710001	64760000	+	ENSSSCG00000041381	ENSSSCG00000041381
8	65700001	65750000	-	ENSSSCG00000008929	ENSSSCG00000008929
8	65700001	65750000	-	ENSSSCG00000008930	TMPRSS11F
8	65810001	65860000	-	ENSSSCG00000038616	ENSSSCG00000038616
8	65900001	65950000	-	ENSSSCG00000008932	TMPRSS11B
8	65900001	65950000	-	ENSSSCG00000008935	ENSSSCG00000008935
8	65920001	65970000	-	ENSSSCG00000022140	TMPRSS11E
8	65950001	66000000	+	ENSSSCG00000035505	YTHDC1
8	66100001	66150000	-	ENSSSCG00000037635	ENSSSCG00000037635
8	66150001	66200000	-	ENSSSCG00000040980	ENSSSCG00000040980
8	66150001	66200000	-	ENSSSCG00000034735	ENSSSCG00000034735
8	66330001	66380000	-	ENSSSCG00000037521	ENSSSCG00000037521
8	66360001	66410000	-	ENSSSCG00000031919	ENSSSCG00000031919
8	66360001	66410000	-	ENSSSCG00000022724	ENSSSCG00000022724
8	68610001	68660000	+	ENSSSCG00000008944	NPFFR2
8	68630001	68680000	-	ENSSSCG00000038180	ADAMTS3
8	69700001	69750000	+	ENSSSCG00000008948	ALB
8	69700001	69750000	+	ENSSSCG00000008950	AFM
8	69700001	69750000	+	ENSSSCG00000023426	ENSSSCG00000023426
8	69730001	69780000	-	ENSSSCG00000008952	RASSF6
8	69900001	69950000	+	ENSSSCG00000008953	CXCL8
8	70170001	70220000	+	ENSSSCG00000008961	MTHFD2L
8	77760001	77810000	+	ENSSSCG00000009018	SH3D19
8	77970001	78020000	+	ENSSSCG00000009021	LRBA
8	96810001	96860000	-	ENSSSCG00000034280	LARP1B
8	96840001	96890000	-	ENSSSCG00000009074	ABHD18
8	120920001	120970000	-	ENSSSCG00000009181	C4orf17
6	46320001	46370000	+	ENSSSCG00000021741	ZNF527
6	46330001	46380000	-	ENSSSCG00000029420	ZNF569
6	52230001	52280000	-	ENSSSCG00000035029	NOVA2
6	52250001	52300000	+	ENSSSCG00000003100	CCDC61
6	52270001	52320000	-	ENSSSCG00000038688	PGLYRP1
6	52300001	52350000	+	ENSSSCG00000003101	HIF3A
6	52440001	52490000	+	ENSSSCG00000033830	CCDC8
6	52460001	52510000	+	ENSSSCG00000022545	CALM3
6	52480001	52530000	-	ENSSSCG00000026602	PTGIR
6	52580001	52630000	-	ENSSSCG00000026152	PRKD2
6	52580001	52630000	-	ENSSSCG00000003104	STRN4
6	52580001	52630000	+	ENSSSCG00000003103	FKRP
6	52600001	52650000	-	ENSSSCG00000003105	SLC1A5
6	52660001	52710000	-	ENSSSCG00000003106	AP2S1
6	52670001	52720000	+	ENSSSCG00000003107	ARHGAP35
6	53860001	53910000	+	ENSSSCG00000003135	KCNJ14
6	53860001	53910000	+	ENSSSCG00000003136	CYTH2
6	53860001	53910000	-	ENSSSCG00000030561	LMTK3
6	53880001	53930000	+	ENSSSCG00000023280	SULT2B1
6	53920001	53970000	-	ENSSSCG00000025975	FAM83E
6	53920001	53970000	+	ENSSSCG00000025441	SPACA4
6	53940001	53990000	-	ENSSSCG00000025928	ENSSSCG00000025928
6	53940001	53990000	+	ENSSSCG00000030425	SPHK2
6	53940001	53990000	-	ENSSSCG00000003148	DBP
6	53980001	54030000	+	ENSSSCG00000040556	ENSSSCG00000040556
6	53980001	54030000	-	ENSSSCG00000003147	CA11
6	53980001	54030000	-	ENSSSCG00000003146	NTN5
6	69030001	69080000	-	ENSSSCG00000033497	ENSSSCG00000033497
6	79000001	79050000	-	ENSSSCG00000003511	HP1BP3
6	79000001	79050000	-	ENSSSCG00000003512	EIF4G3
6	96260001	96310000	+	ENSSSCG00000039227	MC2R
6	96280001	96330000	-	ENSSSCG00000028411	MC5R
6	96290001	96340000	-	ENSSSCG00000025855	RNMT
6	96380001	96430000	-	ENSSSCG00000027417	LDLRAD4
6	162360001	162410000	+	ENSSSCG00000031300	AGBL4
15	37900001	37950000	-	ENSSSCG00000048873	ENSSSCG00000048873
15	37900001	37950000	-	ENSSSCG00000036877	ENSSSCG00000036877
15	37910001	37960000	+	ENSSSCG00000020934	SPAG11
15	37920001	37970000	-	ENSSSCG00000038959	ENSSSCG00000038959
15	38580001	38630000	-	ENSSSCG00000023328	GPM6A
15	38580001	38630000	+	ENSSSCG00000015766	WDR17
15	39710001	39760000	-	ENSSSCG00000015772	AGA
15	39710001	39760000	+	ENSSSCG00000048444	ENSSSCG00000048444
15	39710001	39760000	-	ENSSSCG00000049943	ENSSSCG00000049943
15	39710001	39760000	+	ENSSSCG00000041332	ENSSSCG00000041332
15	44220001	44270000	+	ENSSSCG00000015774	TENM3
15	44510001	44560000	+	ENSSSCG00000051286	ENSSSCG00000051286
15	44610001	44660000	+	ENSSSCG00000021731	WWC2
15	44730001	44780000	-	ENSSSCG00000033315	ENSSSCG00000033315
15	44760001	44810000	-	ENSSSCG00000027901	CLDN22
15	44760001	44810000	-	ENSSSCG00000022456	ENSSSCG00000022456
15	44860001	44910000	+	ENSSSCG00000015779	CDKN2AIP
15	44870001	44920000	+	ENSSSCG00000024555	ING2
15	44960001	45010000	-	ENSSSCG00000015776	RWDD4
15	44960001	45010000	+	ENSSSCG00000015777	TRAPPC11
15	45090001	45140000	+	ENSSSCG00000015780	STOX2
15	46020001	46070000	-	ENSSSCG00000015784	ACSL1
15	46090001	46140000	+	ENSSSCG00000038390	HELT
15	46620001	46670000	-	ENSSSCG00000036679	SORBS2
15	65400001	65450000	-	ENSSSCG00000015876	CCDC148
15	65400001	65450000	+	ENSSSCG00000015878	PKP4
15	68060001	68110000	+	ENSSSCG00000015892	PSMD14
15	75350001	75400000	-	ENSSSCG00000015924	SPC25
15	75350001	75400000	+	ENSSSCG00000015925	G6PC2
15	75360001	75410000	-	ENSSSCG00000015926	ABCB11
15	80830001	80880000	-	ENSSSCG00000022345	ENSSSCG00000022345
15	83450001	83500000	-	ENSSSCG00000038903	ENSSSCG00000038903
15	83450001	83500000	+	ENSSSCG00000047774	ENSSSCG00000047774
15	83840001	83890000	+	ENSSSCG00000023133	OSBPL6
15	94800001	94850000	+	ENSSSCG00000041649	ENSSSCG00000041649
15	94800001	94850000	-	ENSSSCG00000016049	HIBCH
15	105360001	105410000	-	ENSSSCG00000016109	ALS2
15	105360001	105410000	+	ENSSSCG00000022296	CDK15
15	109400001	109450000	-	ENSSSCG00000016127	NDUFS1
15	109410001	109460000	+	ENSSSCG00000016128	EEF1B2
15	109430001	109480000	-	ENSSSCG00000016129	GPR1
15	139760001	139810000	+	ENSSSCG00000036261	CROCC2
15	139980001	140030000	+	ENSSSCG00000016370	SEPTIN2
9	20110001	20160000	+	ENSSSCG00000014915	EED
9	74190001	74240000	+	ENSSSCG00000015326	COL1A2
9	84250001	84300000	-	ENSSSCG00000015355	DGKB
9	84600001	84650000	-	ENSSSCG00000015356	AGMO
9	85590001	85640000	-	ENSSSCG00000015358	CRPPA
9	91500001	91550000	-	ENSSSCG00000015383	RAPGEF5
9	91500001	91550000	+	ENSSSCG00000020970	IL6
9	91520001	91570000	-	ENSSSCG00000015384	TOMM7
9	93580001	93630000	+	ENSSSCG00000015394	KIAA1324L
14	66600001	66650000	+	ENSSSCG00000024081	NRBF2
14	66600001	66650000	-	ENSSSCG00000010226	JMJD1C
14	80390001	80440000	-	ENSSSCG00000010327	POLR3A
14	80430001	80480000	+	ENSSSCG00000039544	ENSSSCG00000039544
14	90640001	90690000	+	ENSSSCG00000010401	ENSSSCG00000010401
14	90640001	90690000	+	ENSSSCG00000010402	ZFAND4
14	117850001	117900000	-	ENSSSCG00000030026	SORCS1
14	120650001	120700000	+	ENSSSCG00000022128	MXI1
14	120690001	120740000	-	ENSSSCG00000030507	SMNDC1
13	1890001	1940000	-	ENSSSCG00000037430	COL6A6
13	27720001	27770000	-	ENSSSCG00000024556	ZNF445
13	27790001	27840000	-	ENSSSCG00000022462	ENSSSCG00000022462
13	27790001	27840000	+	ENSSSCG00000032596	ENSSSCG00000032596
13	27790001	27840000	+	ENSSSCG00000022195	ZKSCAN7
13	27840001	27890000	+	ENSSSCG00000011310	ZNF660
13	27840001	27890000	+	ENSSSCG00000011304	ZNF197
13	27840001	27890000	+	ENSSSCG00000032080	ZNF35
13	27890001	27940000	+	ENSSSCG00000011306	ZNF502
13	27900001	27950000	+	ENSSSCG00000011307	ENSSSCG00000011307
13	27910001	27960000	-	ENSSSCG00000032344	KIAA1143
13	27920001	27970000	+	ENSSSCG00000011309	KIF15
13	28000001	28050000	+	ENSSSCG00000031576	TMEM42
13	28060001	28110000	-	ENSSSCG00000011301	ZDHHC3
13	28130001	28180000	+	ENSSSCG00000011300	EXOSC7
13	28130001	28180000	+	ENSSSCG00000011299	CLEC3B
13	38620001	38670000	-	ENSSSCG00000030359	ARHGEF3
13	67040001	67090000	+	ENSSSCG00000039850	SLC6A11
13	87560001	87610000	-	ENSSSCG00000042542	ENSSSCG00000042542
13	99120001	99170000	+	ENSSSCG00000011729	ENSSSCG00000011729
13	99120001	99170000	-	ENSSSCG00000048567	ENSSSCG00000048567
13	108330001	108380000	-	ENSSSCG00000011743	MECOM
13	108380001	108430000	-	ENSSSCG00000039994	ACTRT3
13	108390001	108440000	+	ENSSSCG00000026829	MYNN
13	108410001	108460000	-	ENSSSCG00000024714	LRRC34
13	108460001	108510000	+	ENSSSCG00000023679	LRRIQ4
13	108470001	108520000	-	ENSSSCG00000032225	LRRC31
13	108630001	108680000	+	ENSSSCG00000028497	SAMD7
13	108630001	108680000	+	ENSSSCG00000029608	SEC62
13	113880001	113930000	+	ENSSSCG00000023871	NAALADL2
13	125370001	125420000	-	ENSSSCG00000011810	BCL6
13	139300001	139350000	-	ENSSSCG00000039888	STXBP5L
13	140850001	140900000	-	ENSSSCG00000026224	ARHGAP31
13	160950001	161000000	-	ENSSSCG00000042338	ENSSSCG00000042338
13	160950001	161000000	-	ENSSSCG00000011986	OR5K4
13	170180001	170230000	-	ENSSSCG00000011999	CADM2
4	35470001	35520000	-	ENSSSCG00000006060	GRHL2
4	35900001	35950000	+	ENSSSCG00000006061	ENSSSCG00000006061
4	36820001	36870000	-	ENSSSCG00000027587	SPAG1
4	36820001	36870000	-	ENSSSCG00000021180	ENSSSCG00000021180
4	36820001	36870000	+	ENSSSCG00000006069	RGS22
4	50320001	50370000	-	ENSSSCG00000006135	CPNE3
4	50320001	50370000	+	ENSSSCG00000006136	RMDN1
4	50330001	50380000	-	ENSSSCG00000006137	WWP1
4	50430001	50480000	+	ENSSSCG00000046388	ENSSSCG00000046388
4	50600001	50650000	+	ENSSSCG00000022935	SLC7A13
4	52280001	52330000	-	ENSSSCG00000006149	RALYL
4	65010001	65060000	+	ENSSSCG00000006194	NCOA2
4	69570001	69620000	+	ENSSSCG00000022092	CYP7B1
4	97770001	97820000	+	ENSSSCG00000006622	POGZ
11	39450001	39500000	-	ENSSSCG00000038842	PCDH9
11	63230001	63280000	+	ENSSSCG00000009489	GPC6
11	63720001	63770000	+	ENSSSCG00000009492	GPR180
16	46770001	46820000	-	ENSSSCG00000050992	ENSSSCG00000050992
16	65490001	65540000	+	ENSSSCG00000017047	CLINT1
1	92220001	92270000	-	ENSSSCG00000004485	CD109
1	92230001	92280000	+	ENSSSCG00000050469	ENSSSCG00000050469
1	92240001	92290000	+	ENSSSCG00000004486	SLC17A5
1	121150001	121200000	+	ENSSSCG00000004636	TRPM7
1	121150001	121200000	-	ENSSSCG00000034352	ENSSSCG00000034352
1	126580001	126630000	-	ENSSSCG00000004675	DUOX1
1	126580001	126630000	-	ENSSSCG00000004676	DUOXA2
1	126580001	126630000	+	ENSSSCG00000004677	DUOXA1
1	126580001	126630000	+	ENSSSCG00000004678	DUOX2
1	126620001	126670000	-	ENSSSCG00000004679	SORD
1	126690001	126740000	-	ENSSSCG00000004680	TERB2
1	127470001	127520000	+	ENSSSCG00000004694	FRMD5
1	169590001	169640000	-	ENSSSCG00000004979	MYO9A
1	169590001	169640000	+	ENSSSCG00000025616	SENP8
1	169590001	169640000	-	ENSSSCG00000026486	ENSSSCG00000026486
1	177290001	177340000	-	ENSSSCG00000005002	MDGA2
1	179910001	179960000	-	ENSSSCG00000005015	SOS2
1	179910001	179960000	-	ENSSSCG00000005016	L2HGDH
1	179930001	179980000	-	ENSSSCG00000050792	ENSSSCG00000050792
1	184490001	184540000	+	ENSSSCG00000005055	LGALS3
1	184490001	184540000	-	ENSSSCG00000005056	DLGAP5
1	187250001	187300000	-	ENSSSCG00000005071	ARMH4
1	187260001	187310000	+	ENSSSCG00000022299	ACTR10
1	202010001	202060000	-	ENSSSCG00000028406	FOCAD
1	215130001	215180000	-	ENSSSCG00000005198	KDM4C
1	215780001	215830000	-	ENSSSCG00000005201	UHRF2
1	215780001	215830000	+	ENSSSCG00000005204	RANBP6
1	215810001	215860000	-	ENSSSCG00000021136	TPD52L3
1	216690001	216740000	-	ENSSSCG00000005211	CD274
1	216690001	216740000	+	ENSSSCG00000005212	PLGRKT
1	216720001	216770000	+	ENSSSCG00000005216	ENSSSCG00000005216
1	219210001	219260000	-	ENSSSCG00000005229	VLDLR
3	72180001	72230000	+	ENSSSCG00000026446	ENSSSCG00000026446
3	72180001	72230000	+	ENSSSCG00000024776	ENSSSCG00000024776
3	72180001	72230000	-	ENSSSCG00000029790	PCYOX1
3	72200001	72250000	+	ENSSSCG00000023409	TIA1
3	87090001	87140000	-	ENSSSCG00000025224	ENSSSCG00000025224
3	87090001	87140000	+	ENSSSCG00000047389	ENSSSCG00000047389
18	23710001	23760000	-	ENSSSCG00000016603	HYAL4
18	23710001	23760000	-	ENSSSCG00000016602	ENSSSCG00000016602
18	23710001	23760000	+	ENSSSCG00000016604	WASL
18	23860001	23910000	-	ENSSSCG00000016606	ASB15
18	23860001	23910000	+	ENSSSCG00000037869	NDUFA5
18	23860001	23910000	+	ENSSSCG00000016608	IQUB
18	23860001	23910000	+	ENSSSCG00000016609	SLC13A1
18	24030001	24080000	-	ENSSSCG00000035710	ENSSSCG00000035710
18	39010001	39060000	+	ENSSSCG00000027063	DPY19L1
18	39010001	39060000	-	ENSSSCG00000016664	NPSR1
7	38410001	38460000	-	ENSSSCG00000044871	ENSSSCG00000044871
7	38410001	38460000	+	ENSSSCG00000001680	ABCC10
7	38410001	38460000	-	ENSSSCG00000001682	DLK2
7	58370001	58420000	-	ENSSSCG00000001885	C15orf39
7	72370001	72420000	-	ENSSSCG00000046557	ENSSSCG00000046557
7	98190001	98240000	+	ENSSSCG00000002377	EIF2B2
7	98190001	98240000	-	ENSSSCG00000051291	ENSSSCG00000051291
7	98190001	98240000	-	ENSSSCG00000002378	MLH3
5	18660001	18710000	+	ENSSSCG00000000273	PRR13
5	18660001	18710000	+	ENSSSCG00000000274	PCBP2
5	18660001	18710000	-	ENSSSCG00000000275	MAP3K12
5	27000001	27050000	+	ENSSSCG00000000457	USP15
5	29590001	29640000	+	ENSSSCG00000000469	LEMD3
5	29590001	29640000	-	ENSSSCG00000042980	ENSSSCG00000042980
5	29600001	29650000	-	ENSSSCG00000045642	ENSSSCG00000045642
5	29650001	29700000	+	ENSSSCG00000026004	MSRB3
5	73600001	73650000	+	ENSSSCG00000000793	PPHLN1
5	75970001	76020000	-	ENSSSCG00000035938	DBX2
12	2690001	2740000	+	ENSSSCG00000039498	RBFOX3
12	35300001	35350000	-	ENSSSCG00000023727	TRIM37
17	31590001	31640000	-	ENSSSCG00000007140	SMOX
10	48710001	48760000	-	ENSSSCG00000011068	ENSSSCG00000011068

## Sheet: TableS6
Table S6. The TWAS results of meat color traits
Trait	GeneID	GeneName	CHR	Start	End	TWAS.P	Tissue
L*	ENSSSCG00000005250	APBA1	1	222758508	222990335	6.45e-06	Brain
	ENSSSCG00000022295		1	268423169	268619636	4.33e-05	Cartilage
	ENSSSCG00000004166	AHI1	1	28566266	28760468	2.77e-07	Hypothalamus
	ENSSSCG00000005319	GBA2	1	236455240	236468210	1.94e-06	Hypothalamus
	ENSSSCG00000014943	DEUP1	9	25689034	25893096	2.19e-05	Jejunum
	ENSSSCG00000022387	TBPL1	1	29899957	29936718	3.42e-05	Large_intestine
	ENSSSCG00000007235	TPX2	17	35431370	35484760	1.28e-05	Lung
	ENSSSCG00000004167	MYB	1	28819503	28857000	8.09e-06	Milk
	ENSSSCG00000004942	TIPIN	1	164350703	164369225	2.02e-05	Milk
	ENSSSCG00000044836		1	28740605	28744731	4.4e-06	Muscle
	ENSSSCG00000000002	GTSE1	5	3227816	3242789	1.72e-05	Oocyte
	ENSSSCG00000023261	GDF5	17	38792323	38797446	1.11e-05	Testis
	ENSSSCG00000041432		1	240998536	241567933	1.09e-05	Testis
	ENSSSCG00000004193	ENPP1	1	31722721	31796595	6.16e-09	Uterus
a*	ENSSSCG00000022692	RINL	6	47672621	47682121	5.8e-07	Adipose
	ENSSSCG00000003486	ARHGEF10L	6	76064311	76229306	1.58e-05	Artery
	ENSSSCG00000002875		6	44074125	44097065	6.49e-06	Blastocyst
	ENSSSCG00000010674	FAM204A	14	128365889	128402560	5e-05	Blastomere
	ENSSSCG00000014031		2	80181713	80194169	2.16e-05	Blastomere
	ENSSSCG00000009879	TPCN1	14	38668138	38773186	5.07e-05	Cartilage
	ENSSSCG00000046387	PSMD2	13	122157036	122199464	1.01e-05	Colon
	ENSSSCG00000023298	SRXN1	17	34582440	34589308	1.85e-05	Colon
	ENSSSCG00000002806	MMP15	6	19890884	19918244	2.27e-05	Colon
	ENSSSCG00000035226		6	58662583	58666026	2.88e-05	Colon
	ENSSSCG00000010054	ADORA2A	14	49468862	49485841	1.03e-05	Embryo
	ENSSSCG00000046495		14	54538161	54541533	1.47e-05	Embryo
	ENSSSCG00000051369		2	81613809	81641014	2.3e-05	Heart
	ENSSSCG00000008237	RETSAT	3	59399688	59416685	1.56e-05	Hypothalamus
	ENSSSCG00000003044	LYPD4	6	50010558	50023571	1.77e-05	Hypothalamus
	ENSSSCG00000003465	FBLIM1	6	74909720	74966965	1.99e-05	Hypothalamus
	ENSSSCG00000047236		15	77710637	77720208	3.46e-06	Large_intestine
	ENSSSCG00000050000		15	77700009	77707787	2.4e-05	Large_intestine
	ENSSSCG00000035226		6	58662583	58666026	3.27e-05	Large_intestine
	ENSSSCG00000011450	ITIH1	13	34892339	34924812	2.9e-06	Liver
	ENSSSCG00000034844		14	55808639	55912219	1.03e-05	Liver
	ENSSSCG00000007004	INTS10	17	12034062	12087884	1.22e-05	Lung
	ENSSSCG00000003169	PIH1D1	6	54524172	54537588	2.9e-05	Macrophage
	ENSSSCG00000011417	DCAF1	13	33670974	33750734	9.73e-05	Morula
	ENSSSCG00000031082	ATP13A2	6	75618416	75638591	0.000147	Morula
	ENSSSCG00000007246	TM9SF4	17	35765323	35822359	1.26e-06	Muscle
	ENSSSCG00000027629	CDIPT	3	18084549	18091798	6.32e-05	Oocyte
	ENSSSCG00000003486	ARHGEF10L	6	76064311	76229306	3.65e-05	Oocyte
	ENSSSCG00000006350		4	88873762	88989769	1.45e-05	Synovial_membrane
	ENSSSCG00000023261	GDF5	17	38792323	38797446	9.66e-06	Testis
	ENSSSCG00000034389		6	47419157	47419218	6.41e-06	Testis
	ENSSSCG00000046546		14	104180736	104192160	2.11e-05	Uterus
	ENSSSCG00000004193	ENPP1	1	31722721	31796595	4.43e-06	Uterus
	ENSSSCG00000003156	HRC	6	54337347	54341626	1.63e-05	Uterus
	ENSSSCG00000023686	TTR	6	115496193	115503977	2.73e-05	Uterus
b*	ENSSSCG00000010166	NTPCR	14	57802564	57833151	1.36e-07	Adipose
	ENSSSCG00000028431	HSD17B4	2	123313448	123402731	1.83e-05	Adipose
	ENSSSCG00000007717	METTL27	3	11054828	11057704	1.87e-05	Blastocyst
	ENSSSCG00000021026	TMEM51	6	74434050	74486781	5.63e-06	Blastocyst
	ENSSSCG00000028698	CCDC47	12	15165405	15204719	1.24e-05	Blastomere
	ENSSSCG00000003458	CTRC	6	74651805	74706594	4.49e-05	Blastomere
	ENSSSCG00000031166	ZNF296	6	51504388	51508324	0.000131	Blastomere
	ENSSSCG00000003464	DNAJC16	6	74732169	74774311	1.59e-06	Cartilage
	ENSSSCG00000002806	MMP15	6	19890884	19918244	4.82e-07	Colon
	ENSSSCG00000003478	CROCC	6	75559077	75606299	1.53e-05	Colon
	ENSSSCG00000022780	UGCG	1	252651879	252688550	7.34e-06	Frontal_cortex
	ENSSSCG00000009717	CBR4	14	20621981	20682232	3.74e-05	Heart
	ENSSSCG00000017285		12	15073407	15085899	4.79e-07	Hypothalamus
	ENSSSCG00000017288	FTSJ3	12	15091729	15114398	1.73e-05	Hypothalamus
	ENSSSCG00000003458	CTRC	6	74651805	74706594	1.83e-08	Hypothalamus
	ENSSSCG00000003465	FBLIM1	6	74909720	74966965	2.26e-09	Hypothalamus
	ENSSSCG00000003479	MFAP2	6	75607513	75615641	3.07e-06	Hypothalamus
	ENSSSCG00000003455	FHAD1	6	74508097	74642231	5.41e-07	Ileum
	ENSSSCG00000020926	SDHB	6	75648215	75678378	3.26e-07	Ileum
	ENSSSCG00000031083	SZRD1	6	75459138	75485324	1.38e-06	Ileum
	ENSSSCG00000017288	FTSJ3	12	15091729	15114398	2.44e-05	Jejunum
	ENSSSCG00000003455	FHAD1	6	74508097	74642231	8.25e-07	Jejunum
	ENSSSCG00000042140		6	157856510	157866301	2.95e-05	Jejunum
	ENSSSCG00000026505	SETD6	6	20266552	20274658	3.99e-06	Large_intestine
	ENSSSCG00000019309	SNORA63	13	124586670	124586800	3.72e-07	Liver
	ENSSSCG00000007235	TPX2	17	35431370	35484760	2.42e-06	Lung
	ENSSSCG00000003470	FAM131C	6	75193399	75213147	1.4e-06	Lung
	ENSSSCG00000003479	MFAP2	6	75607513	75615641	3.2e-09	Lung
	ENSSSCG00000021519	CPNE2	6	19046795	19098915	2.63e-05	Macrophage
	ENSSSCG00000038461		5	61181192	61182244	3.27e-05	Milk
	ENSSSCG00000003485	RCC2	6	75988271	76014160	1.5e-06	Milk
	ENSSSCG00000031082	ATP13A2	6	75618416	75638591	2.73e-08	Morula
	ENSSSCG00000003464	DNAJC16	6	74732169	74774311	4.73e-06	Muscle
	ENSSSCG00000003486	ARHGEF10L	6	76064311	76229306	1.01e-07	Oocyte
	ENSSSCG00000033421		12	16288597	16308548	4.66e-07	Small_intestine
	ENSSSCG00000000642	KLRD1	5	61646505	61672115	3.57e-06	Small_intestine
	ENSSSCG00000003455	FHAD1	6	74508097	74642231	3.91e-06	Small_intestine
	ENSSSCG00000002812	KIFC3	6	19659987	19730359	1.07e-06	Spleen
	ENSSSCG00000026103	ZBTB17	6	75107427	75144069	1.95e-08	Spleen
	ENSSSCG00000032985	GOT2	6	20407198	20432068	1.73e-05	Spleen
	ENSSSCG00000045605		6	159619092	159637831	2.37e-05	Spleen
	ENSSSCG00000003486	ARHGEF10L	6	76064311	76229306	1.37e-05	Synovial_membrane
	ENSSSCG00000017285		12	15073407	15085899	1e-05	Testis
	ENSSSCG00000007709	TBL2	3	10850350	10892385	1e-05	Testis
	ENSSSCG00000003460	CASP9	6	74706515	74730092	6.96e-07	Testis
C*	ENSSSCG00000010166	NTPCR	14	57802564	57833151	9.05e-06	Adipose
	ENSSSCG00000022692	RINL	6	47672621	47682121	7.88e-07	Adipose
	ENSSSCG00000003486	ARHGEF10L	6	76064311	76229306	2.45e-06	Artery
	ENSSSCG00000002875		6	44074125	44097065	2.13e-05	Blastocyst
	ENSSSCG00000003854	ECHDC2	6	159326150	159349471	2.28e-05	Blastocyst
	ENSSSCG00000021026	TMEM51	6	74434050	74486781	7.37e-06	Blastocyst
	ENSSSCG00000003458	CTRC	6	74651805	74706594	0.000123	Blastomere
	ENSSSCG00000009879	TPCN1	14	38668138	38773186	6.33e-05	Cartilage
	ENSSSCG00000003464	DNAJC16	6	74732169	74774311	2.97e-06	Cartilage
	ENSSSCG00000023298	SRXN1	17	34582440	34589308	1.98e-05	Colon
	ENSSSCG00000002806	MMP15	6	19890884	19918244	6.58e-07	Colon
	ENSSSCG00000035226		6	58662583	58666026	1.4e-05	Colon
	ENSSSCG00000010054	ADORA2A	14	49468862	49485841	5.91e-06	Embryo
	ENSSSCG00000010341	TSPAN14	14	82305714	82364661	1.54e-05	Embryo
	ENSSSCG00000009717	CBR4	14	20621981	20682232	3.14e-05	Heart
	ENSSSCG00000003044	LYPD4	6	50010558	50023571	4.5e-06	Hypothalamus
	ENSSSCG00000003458	CTRC	6	74651805	74706594	3.36e-07	Hypothalamus
	ENSSSCG00000003465	FBLIM1	6	74909720	74966965	1.25e-08	Hypothalamus
	ENSSSCG00000003479	MFAP2	6	75607513	75615641	6.35e-06	Hypothalamus
	ENSSSCG00000003455	FHAD1	6	74508097	74642231	1.4e-06	Ileum
	ENSSSCG00000020926	SDHB	6	75648215	75678378	7.76e-06	Ileum
	ENSSSCG00000031083	SZRD1	6	75459138	75485324	3.41e-06	Ileum
	ENSSSCG00000032083	MRPL37	6	158082029	158143463	1.24e-05	Ileum
	ENSSSCG00000003455	FHAD1	6	74508097	74642231	8.56e-06	Jejunum
	ENSSSCG00000042140		6	157856510	157866301	1.75e-05	Jejunum
	ENSSSCG00000047236		15	77710637	77720208	4.84e-06	Large_intestine
	ENSSSCG00000050000		15	77700009	77707787	1.37e-05	Large_intestine
	ENSSSCG00000035226		6	58662583	58666026	1.56e-05	Large_intestine
	ENSSSCG00000034844		14	55808639	55912219	5.27e-06	Liver
	ENSSSCG00000038853	GPR137B	14	55125409	55181687	2.11e-05	Lung
	ENSSSCG00000007235	TPX2	17	35431370	35484760	1.28e-05	Lung
	ENSSSCG00000003470	FAM131C	6	75193399	75213147	7.66e-06	Lung
	ENSSSCG00000003479	MFAP2	6	75607513	75615641	5.99e-08	Lung
	ENSSSCG00000021519	CPNE2	6	19046795	19098915	8.99e-06	Macrophage
	ENSSSCG00000003485	RCC2	6	75988271	76014160	1.96e-06	Milk
	ENSSSCG00000031082	ATP13A2	6	75618416	75638591	2.83e-07	Morula
	ENSSSCG00000007246	TM9SF4	17	35765323	35822359	3.3e-07	Muscle
	ENSSSCG00000003464	DNAJC16	6	74732169	74774311	7.29e-06	Muscle
	ENSSSCG00000003486	ARHGEF10L	6	76064311	76229306	1.84e-07	Oocyte
	ENSSSCG00000002812	KIFC3	6	19659987	19730359	1.53e-06	Spleen
	ENSSSCG00000026103	ZBTB17	6	75107427	75144069	1.58e-07	Spleen
	ENSSSCG00000045605		6	159619092	159637831	1.82e-05	Spleen
	ENSSSCG00000015951	METAP1D	15	78098413	78186171	1.01e-05	Testis
	ENSSSCG00000015955	ITGA6	15	78504078	78591779	3.5e-06	Testis
	ENSSSCG00000023261	GDF5	17	38792323	38797446	1.14e-05	Testis
	ENSSSCG00000003460	CASP9	6	74706515	74730092	6.21e-06	Testis
	ENSSSCG00000023686	TTR	6	115496193	115503977	1.53e-05	Uterus
h°	ENSSSCG00000046701		16	29257158	29264062	2e-06	Adipose
	ENSSSCG00000048222		16	29168804	29174269	1.94e-07	Adipose
	ENSSSCG00000035371		17	12428893	12498590	8.73e-07	Adipose
	ENSSSCG00000044266		2	81007272	81011090	3.68e-06	Adipose
	ENSSSCG00000051369		2	81613809	81641014	4.93e-06	Adipose
	ENSSSCG00000028523	HUS1	18	48522997	48538788	3.81e-06	Artery
	ENSSSCG00000004193	ENPP1	1	31722721	31796595	3.2e-09	Blastocyst
	ENSSSCG00000002660	MTHFSD	6	2561212	2586630	2.17e-05	Blastocyst
	ENSSSCG00000036356	ZSCAN2	7	52910849	52957983	1.61e-05	Blastocyst
	ENSSSCG00000014031		2	80181713	80194169	2.01e-06	Blastomere
	ENSSSCG00000025022		3	56903505	56956044	1.46e-05	Blood
	ENSSSCG00000006764	PTPN22	4	106686604	106758099	8.82e-06	Blood
	ENSSSCG00000042447	APOBEC2	7	36364300	36384299	6.58e-06	Blood
	ENSSSCG00000016918	MAP3K1	16	35871799	35946987	2.6e-06	Brain
	ENSSSCG00000045259		2	120468063	120469995	3.01e-06	Brain
	ENSSSCG00000046387	PSMD2	13	122157036	122199464	6.3e-07	Colon
	ENSSSCG00000032275	MRPS30	16	29110731	29166076	3.93e-07	Colon
	ENSSSCG00000033472		1	129131216	129132295	2.41e-05	Colon
	ENSSSCG00000028858	FAM83C	17	38646442	38651884	7.46e-06	Embryo
	ENSSSCG00000037238	DBF4B	12	18603797	18630543	1.57e-06	Frontal_cortex
	ENSSSCG00000041429		13	117398483	117404576	7.81e-07	Frontal_cortex
	ENSSSCG00000007030	IKBKB	17	11289690	11348553	2.15e-05	Frontal_cortex
	ENSSSCG00000014048	HK3	2	80929267	81060829	1.4e-05	Frontal_cortex
	ENSSSCG00000040507	PDLIM7	2	80451888	80472660	4.53e-08	Heart
	ENSSSCG00000051369		2	81613809	81641014	4.66e-10	Heart
	ENSSSCG00000017371	TMEM101	12	19128654	19169009	6.51e-06	Hypothalamus
	ENSSSCG00000004300	SMIM8	1	55753908	55766869	1.73e-06	Hypothalamus
	ENSSSCG00000043814		1	2120933	2128580	2.49e-05	Hypothalamus
	ENSSSCG00000008237	RETSAT	3	59399688	59416685	7.29e-06	Hypothalamus
	ENSSSCG00000001459	HLA-DOB	7	25030438	25037951	9.39e-06	Ileum
	ENSSSCG00000044174		17	12087986	12091643	2.89e-05	Jejunum
	ENSSSCG00000049043		11	7168506	7187824	1.23e-05	Liver
	ENSSSCG00000036790	AKAP7	1	32221065	32362001	1.07e-07	Liver
	ENSSSCG00000014039	RGS14	2	80574411	80590003	5.23e-07	Liver
	ENSSSCG00000051369		2	81613809	81641014	6.62e-09	Liver
	ENSSSCG00000017351	MEIOC	12	18652493	18671909	2.08e-05	Lung
	ENSSSCG00000046701		16	29257158	29264062	4.44e-07	Lung
	ENSSSCG00000044174		17	12087986	12091643	1.61e-06	Lung
	ENSSSCG00000004201	TMEM200A	1	32961754	33033019	1.01e-05	Lung
	ENSSSCG00000045564		11	6836586	6839947	2.59e-05	Macrophage
	ENSSSCG00000029796	KBTBD11	15	33494430	33497201	3.35e-05	Macrophage
	ENSSSCG00000016868		16	27738615	27757915	1.08e-05	Macrophage
	ENSSSCG00000016878	FGF10	16	28695469	28777541	5.52e-07	Macrophage
	ENSSSCG00000004307	AKIRIN2	1	56043345	56070164	1.61e-05	Macrophage
	ENSSSCG00000004791	RASGRP1	1	132702541	132786532	6.24e-08	Macrophage
	ENSSSCG00000040507	PDLIM7	2	80451888	80472660	1.08e-07	Macrophage
	ENSSSCG00000008207	RPIA	3	57355979	57386946	3.06e-07	Macrophage
	ENSSSCG00000003108	NPAS1	6	52856029	52874718	4.98e-06	Macrophage
	ENSSSCG00000001457	SLA-DQB1	7	24943107	24977297	7.42e-06	Macrophage
	ENSSSCG00000029183	SEC11A	7	52829262	52875623	2.04e-05	Macrophage
	ENSSSCG00000034049	TRIM16	12	58926085	58939913	6.13e-06	Milk
	ENSSSCG00000035051	ADORA2B	12	59393220	59449692	2.9e-06	Milk
	ENSSSCG00000007004	INTS10	17	12034062	12087884	6.29e-06	Milk
	ENSSSCG00000045712	OLFML3	4	106563450	106627166	1.23e-05	Milk
	ENSSSCG00000016872	HMGCS1	16	27936217	27957194	7.75e-05	Morula
	ENSSSCG00000014060	KIAA1191	2	81520408	81539621	5.56e-07	Oocyte
	ENSSSCG00000031967	TAOK2	3	18166847	18198089	1.28e-05	Oocyte
	ENSSSCG00000016861	C6	16	26023684	26084652	4.55e-06	Ovary
	ENSSSCG00000000757	ADIPOR2	5	68755811	68807235	1.13e-05	Ovary
	ENSSSCG00000033993	PLCXD3	16	26165587	26347136	1.74e-05	Small_intestine
	ENSSSCG00000033993	PLCXD3	16	26165587	26347136	6.73e-06	Spleen
	ENSSSCG00000046701		16	29257158	29264062	7.75e-06	Spleen
	ENSSSCG00000036790	AKAP7	1	32221065	32362001	4.63e-06	Spleen
	ENSSSCG00000014054	GPRIN1	2	81315368	81318382	2.22e-06	Spleen
	ENSSSCG00000046723		2	103414409	103448260	1.72e-05	Synovial_membrane
	ENSSSCG00000025367		13	34029457	34031716	1.03e-06	Testis
	ENSSSCG00000023338	CHRNA6	17	11725375	11739747	1.52e-06	Testis
	ENSSSCG00000004203	L3MBTL3	1	33198301	33319367	3.58e-08	Testis
	ENSSSCG00000034966	TTC33	16	25674665	25742743	2.21e-05	Uterus
	ENSSSCG00000004193	ENPP1	1	31722721	31796595	1.11e-09	Uterus
